# Supplementary material for: Sarcomeres Morphology and Z-Line Arrangement Disarray Induced by Ventricular Premature Contractions through the Rac2/Cofilin Pathway
Source: MDPI journal article supplement (doi:10.3390/ijms222011244), 2021-10-18

**Content**

**Supplemental Table S1.** ..... 1

**Supplemental Table S2.** ..... 10

**Supplemental Table S3.** ..... 24

**Supplemental Table S4.** ..... 37

**Supplemental Table S5.** ..... 45

**Supplemental Figure S1.**..... 46

**Supplemental Figure S2.**..... 47

**Supplemental Figure S3.**..... 49

**Supplemental Figure S4.**..... 51

**Supplemental Figure S5.**..... 52

**Supplemental Table S1.**

Selected signature Sus Scrofa gene expressions altered > 1.5-fold change (Log<sub>2</sub>FC (RVOT-VPC/sham control) > 0.58) in the left ventricular septal tissues of RVOT VPC group vs. sham control group at 6-month follow-up

| Symbol                  | Description                                                      | Log <sub>2</sub> FC | P value |
|-------------------------|------------------------------------------------------------------|---------------------|---------|
| gene:ENSSSCG00000038101 |                                                                  | 6.40                | 0.01    |
| gene:ENSSSCG00000025086 |                                                                  | 5.67                | 0.03    |
| UMODL1                  | uromodulin like 1                                                | 5.45                | 0.00    |
| MDGA2                   | MAM domain containing<br>glycosylphosphatidylinositol anchor 2   | 5.09                | 0.05    |
| ADIPOQ                  | adiponectin, C1Q and collagen domain<br>containing               | 4.89                | 0.00    |
| CTNND2                  | catenin delta 2                                                  | 4.53                | 0.00    |
| SCN3B                   | sodium voltage-gated channel beta subunit<br>3                   | 4.40                | 0.00    |
| UBXN10                  | UBX domain protein 10                                            | 4.00                | 0.00    |
| OAZ3                    | ornithine decarboxylase antizyme 3                               | 3.88                | 0.00    |
| SYT1                    | synaptotagmin 1                                                  | 3.80                | 0.00    |
| PLIN1                   | perilipin 1                                                      | 3.79                | 0.03    |
| SLN                     | sarcolipin                                                       | 3.28                | 0.00    |
| gene:ENSSSCG00000034962 |                                                                  | 3.25                | 0.00    |
| IFITM5                  | interferon induced transmembrane protein 5                       | 3.17                | 0.04    |
| NPAS4                   | neuronal PAS domain protein 4                                    | 3.11                | 0.04    |
| VSIG2                   | V-set and immunoglobulin domain<br>containing 2                  | 3.07                | 0.00    |
| C1orf210                | chromosome 1 open reading frame 210                              | 3.07                | 0.00    |
| RBP7                    | retinol binding protein 7                                        | 2.94                | 0.01    |
| gene:ENSSSCG00000001395 |                                                                  | 2.94                | 0.00    |
| KCNG2                   | potassium voltage-gated channel modifier<br>subfamily G member 2 | 2.84                | 0.01    |
| gene:ENSSSCG00000011324 |                                                                  | 2.76                | 0.00    |
| IL23A                   | interleukin 23 subunit alpha                                     | 2.75                | 0.02    |
| gene:ENSSSCG00000036748 |                                                                  | 2.75                | 0.02    |
| gene:ENSSSCG00000006525 |                                                                  | 2.74                | 0.05    |
| gene:ENSSSCG00000040285 |                                                                  | 2.60                | 0.01    |
| NNAT                    | neuronatin                                                       | 2.59                | 0.00    |
| KRT18                   | keratin 18                                                       | 2.59                | 0.02    |

|                         |                                                                  |      |      |
|-------------------------|------------------------------------------------------------------|------|------|
| FGF16                   | fibroblast growth factor 16                                      | 2.58 | 0.00 |
| gene:ENSSSCG00000031997 |                                                                  | 2.58 | 0.00 |
| DLK2                    | delta like non-canonical Notch ligand 2                          | 2.55 | 0.04 |
| TNNC2                   | troponin C2, fast skeletal type                                  | 2.48 | 0.01 |
| EYA1                    | EYA transcriptional coactivator and<br>phosphatase 1             | 2.47 | 0.00 |
| FOSB                    | FosB proto-oncogene, AP-1 transcription<br>factor subunit        | 2.44 | 0.00 |
| BDNF                    | brain derived neurotrophic factor                                | 2.44 | 0.00 |
| gene:ENSSSCG00000014186 |                                                                  | 2.39 | 0.02 |
| gene:ENSSSCG00000036109 |                                                                  | 2.38 | 0.02 |
| DNAAF1                  | dynein axonemal assembly factor 1                                | 2.35 | 0.04 |
| SPOCK3                  | SPARC/osteonectin, cwcv and kazal like<br>domains proteoglycan 3 | 2.35 | 0.02 |
| RGS9BP                  | regulator of G protein signaling 9 binding<br>protein            | 2.31 | 0.02 |
| EMID1                   | EMI domain containing 1                                          | 2.29 | 0.01 |
| PLEK2                   | pleckstrin 2                                                     | 2.24 | 0.00 |
| gene:ENSSSCG00000031255 |                                                                  | 2.24 | 0.01 |
| PTPN18                  | protein tyrosine phosphatase, non-receptor<br>type 18            | 2.18 | 0.01 |
| SSUH2                   | ssu-2 homolog (C. elegans)                                       | 2.14 | 0.03 |
| CDH12                   | cadherin 12                                                      | 2.13 | 0.02 |
| IGSF5                   | immunoglobulin superfamily member 5                              | 2.09 | 0.03 |
| SUSD4                   | sushi domain containing 4                                        | 2.08 | 0.02 |
| B4GALT6                 | beta-1,4-galactosyltransferase 6                                 | 2.08 | 0.02 |
| gene:ENSSSCG00000040146 |                                                                  | 2.08 | 0.01 |
| LONRF2                  | LON peptidase N-terminal domain and ring<br>finger 2             | 2.02 | 0.02 |
| SMCO1                   | single-pass membrane protein with<br>coiled-coil domains 1       | 2.01 | 0.01 |
| NPPA                    | natriuretic peptide A                                            | 1.98 | 0.00 |
| ARG2                    | arginase 2                                                       | 1.93 | 0.00 |
| TMEM82                  | transmembrane protein 82                                         | 1.93 | 0.05 |
| TMEM163                 | transmembrane protein 163                                        | 1.91 | 0.01 |
| PPEF2                   | protein phosphatase with EF-hand domain<br>2                     | 1.90 | 0.02 |
| IL20RA                  | interleukin 20 receptor subunit alpha                            | 1.88 | 0.04 |

|                         |                                                      |      |      |
|-------------------------|------------------------------------------------------|------|------|
| LIPN                    | lipase family member N                               | 1.87 | 0.04 |
| MYMK                    | myomaker, myoblast fusion factor                     | 1.87 | 0.00 |
| gene:ENSSSCG00000040453 |                                                      | 1.86 | 0.00 |
| ALDOB                   | aldolase, fructose-bisphosphate B                    | 1.86 | 0.00 |
| NR0B2                   | nuclear receptor subfamily 0 group B member 2        | 1.85 | 0.00 |
| gene:ENSSSCG00000014272 |                                                      | 1.82 | 0.00 |
| CYP2B22                 |                                                      | 1.82 | 0.03 |
| SHOX2                   | short stature homeobox 2                             | 1.78 | 0.01 |
| SLC39A12                | solute carrier family 39 member 12                   | 1.78 | 0.03 |
| FRZB                    | frizzled related protein                             | 1.78 | 0.01 |
| IRX2                    | iroquois homeobox 2                                  | 1.75 | 0.01 |
| gene:ENSSSCG00000005479 |                                                      | 1.74 | 0.05 |
| gene:ENSSSCG00000035477 |                                                      | 1.72 | 0.04 |
| AGXT2                   | alanine--glyoxylate aminotransferase 2               | 1.72 | 0.05 |
| DKK3                    | dickkopf WNT signaling pathway inhibitor 3           | 1.72 | 0.00 |
| MNS1                    | meiosis specific nuclear structural 1                | 1.71 | 0.00 |
| gene:ENSSSCG00000029866 |                                                      | 1.71 | 0.00 |
| IQCF2                   | IQ motif containing F2                               | 1.71 | 0.03 |
| CHI3L2                  | chitinase 3 like 2                                   | 1.71 | 0.03 |
| gene:ENSSSCG00000014975 |                                                      | 1.71 | 0.03 |
| gene:ENSSSCG00000009500 |                                                      | 1.70 | 0.00 |
| gene:ENSSSCG00000028944 |                                                      | 1.68 | 0.01 |
| CENPS                   | centromere protein S                                 | 1.68 | 0.02 |
| VSNL1                   | visinin like 1                                       | 1.68 | 0.04 |
| SCIN                    | scinderin                                            | 1.66 | 0.04 |
| STX5                    | syntaxin 5                                           | 1.65 | 0.03 |
| gene:ENSSSCG00000036911 |                                                      | 1.63 | 0.02 |
| GRIK4                   | glutamate ionotropic receptor kainate type subunit 4 | 1.63 | 0.03 |
| GRAMD1B                 | GRAM domain containing 1B                            | 1.62 | 0.00 |
| PADI2                   | peptidyl arginine deiminase 2                        | 1.60 | 0.00 |
| GADL1                   | glutamate decarboxylase like 1                       | 1.59 | 0.00 |
| L3HYPDH                 | trans-L-3-hydroxyproline dehydratase                 | 1.59 | 0.00 |
| ITGAE                   | integrin subunit alpha E                             | 1.57 | 0.00 |
| LRRC23                  | leucine rich repeat containing 23                    | 1.55 | 0.05 |
| OSR2                    | odd-skipped related transcription factor 2           | 1.55 | 0.04 |

|                         |                                                                     |      |      |
|-------------------------|---------------------------------------------------------------------|------|------|
| EXD1                    | exonuclease 3'-5' domain containing 1                               | 1.54 | 0.00 |
| HMGCLL1                 | 3-hydroxymethyl-3-methylglutaryl-CoA<br>lyase like 1                | 1.53 | 0.01 |
| IRX6                    | iroquois homeobox 6                                                 | 1.52 | 0.00 |
| KCNS3                   | potassium voltage-gated channel modifier<br>subfamily S member 3    | 1.51 | 0.01 |
| NRSN2                   | neurensin 2                                                         | 1.49 | 0.02 |
| PLIN5                   | perilipin 5                                                         | 1.48 | 0.00 |
| UOX                     | urate oxidase (pseudogene)                                          | 1.46 | 0.04 |
| GNB3                    | G protein subunit beta 3                                            | 1.46 | 0.00 |
| WWC1                    | WW and C2 domain containing 1                                       | 1.44 | 0.02 |
| MYOZ1                   | myozenin 1                                                          | 1.43 | 0.03 |
| HBB                     | hemoglobin subunit beta                                             | 1.42 | 0.01 |
| SERPINF1                | serpin family F member 1                                            | 1.38 | 0.01 |
| HEPACAM                 | hepatic and glial cell adhesion molecule                            | 1.38 | 0.01 |
| GLIPR1                  | GLI pathogenesis related 1                                          | 1.37 | 0.00 |
| SAYS1D1                 | SAYS1FN motif domain containing 1                                   | 1.37 | 0.02 |
| RGS6                    | regulator of G protein signaling 6                                  | 1.36 | 0.02 |
| gene:ENSSSCG00000013593 |                                                                     | 1.36 | 0.02 |
| ENPP5                   | ectonucleotide<br>pyrophosphatase/phosphodiesterase 5<br>(putative) | 1.34 | 0.01 |
| gene:ENSSSCG00000035706 |                                                                     | 1.33 | 0.05 |
| CCDC136                 | coiled-coil domain containing 136                                   | 1.33 | 0.00 |
| TMCO4                   | transmembrane and coiled-coil domains 4                             | 1.33 | 0.02 |
| STRC                    | stereocilin                                                         | 1.31 | 0.01 |
| gene:ENSSSCG00000038945 |                                                                     | 1.31 | 0.02 |
| ATF3                    | activating transcription factor 3                                   | 1.30 | 0.00 |
| LRRC4B                  | leucine rich repeat containing 4B                                   | 1.30 | 0.01 |
| NEU3                    | neuraminidase 3                                                     | 1.29 | 0.00 |
| NR4A1                   | nuclear receptor subfamily 4 group A<br>member 1                    | 1.27 | 0.00 |
| ADRA2B                  | adrenoceptor alpha 2B                                               | 1.27 | 0.00 |
| ACSM3                   | acyl-CoA synthetase medium chain family<br>member 3                 | 1.26 | 0.03 |
| CCDC173                 | coiled-coil domain containing 173                                   | 1.25 | 0.02 |
| XKRX                    | XK related, X-linked                                                | 1.24 | 0.01 |
| NAAA                    | N-acylethanolamine acid amidase                                     | 1.24 | 0.00 |

|                         |                                                               |      |      |
|-------------------------|---------------------------------------------------------------|------|------|
| ADAMTS14                | ADAM metalloproteinase with<br>thrombospondin type 1 motif 14 | 1.23 | 0.02 |
| gene:ENSSSCG00000016215 |                                                               | 1.23 | 0.02 |
| IL10RA                  | interleukin 10 receptor subunit alpha                         | 1.23 | 0.00 |
| FAM155B                 | family with sequence similarity 155<br>member B               | 1.22 | 0.00 |
| RNF180                  | ring finger protein 180                                       | 1.22 | 0.00 |
| DUSP5                   | dual specificity phosphatase 5                                | 1.21 | 0.03 |
| TNNT1                   | troponin T1, slow skeletal type                               | 1.21 | 0.01 |
| RIPOR2                  | RHO family interacting cell polarization<br>regulator 2       | 1.21 | 0.00 |
| FGD6                    | FYVE, RhoGEF and PH domain containing<br>6                    | 1.20 | 0.00 |
| FGFRL1                  | fibroblast growth factor receptor like 1                      | 1.19 | 0.01 |
| EFCC1                   | EF-hand and coiled-coil domain containing<br>1                | 1.19 | 0.03 |
| IFI27L2                 | interferon alpha inducible protein 27 like 2                  | 1.18 | 0.04 |
| RAB6B                   | RAB6B, member RAS oncogene family                             | 1.18 | 0.05 |
| FRMD1                   | FERM domain containing 1                                      | 1.17 | 0.03 |
| AGT                     | angiotensinogen                                               | 1.16 | 0.01 |
| DRD2                    | dopamine receptor D2                                          | 1.16 | 0.04 |
| HIST1H2BD               | histone cluster 1 H2B family member d                         | 1.16 | 0.00 |
| GABRA4                  | gamma-aminobutyric acid type A receptor<br>alpha4 subunit     | 1.16 | 0.00 |
| FAM46B                  | family with sequence similarity 46 member<br>B                | 1.15 | 0.00 |
| TSPAN2                  | tetraspanin 2                                                 | 1.14 | 0.01 |
| gene:ENSSSCG00000031450 |                                                               | 1.12 | 0.00 |
| CXCL2                   | C-X-C motif chemokine ligand 2                                | 1.09 | 0.02 |
| TACR1                   | tachykinin receptor 1                                         | 1.09 | 0.04 |
| GPC3                    | glypican 3                                                    | 1.09 | 0.00 |
| gene:ENSSSCG00000003793 |                                                               | 1.09 | 0.04 |
| ADIRF                   | adipogenesis regulatory factor                                | 1.08 | 0.02 |
| PRMT8                   | protein arginine methyltransferase 8                          | 1.07 | 0.01 |
| gene:ENSSSCG00000011147 |                                                               | 1.05 | 0.00 |
| MYO5B                   | myosin VB                                                     | 1.05 | 0.05 |
| ZPBP                    | zona pellucida binding protein                                | 1.03 | 0.04 |
| EDIL3                   | EGF like repeats and discoidin domains 3                      | 1.02 | 0.00 |

|                         |                                                      |      |      |
|-------------------------|------------------------------------------------------|------|------|
| FADS3                   | fatty acid desaturase 3                              | 1.00 | 0.00 |
| THRSP                   | thyroid hormone responsive                           | 1.00 | 0.03 |
| CSDC2                   | cold shock domain containing C2                      | 0.99 | 0.05 |
| KIAA1324L               | KIAA1324 like                                        | 0.98 | 0.00 |
| OLFM1                   | olfactomedin 1                                       | 0.96 | 0.04 |
| S1PR2                   | sphingosine-1-phosphate receptor 2                   | 0.96 | 0.01 |
| GCK                     | glucokinase                                          | 0.95 | 0.04 |
| ACER1                   | alkaline ceramidase 1                                | 0.94 | 0.04 |
| WSCD2                   | WSC domain containing 2                              | 0.94 | 0.01 |
| MLLT11                  | MLLT11, transcription factor 7 cofactor              | 0.94 | 0.00 |
| NR4A3                   | nuclear receptor subfamily 4 group A member 3        | 0.93 | 0.01 |
| SORL1                   | sortilin related receptor 1                          | 0.93 | 0.00 |
| CYB5A                   | cytochrome b5 type A                                 | 0.91 | 0.00 |
| RASD1                   | ras related dexamethasone induced 1                  | 0.90 | 0.04 |
| GNMT                    | glycine N-methyltransferase                          | 0.89 | 0.02 |
| IGF2BP3                 | insulin like growth factor 2 mRNA binding protein 3  | 0.89 | 0.04 |
| gene:ENSSSCG00000036306 |                                                      | 0.89 | 0.04 |
| FAM46C                  | family with sequence similarity 46 member C          | 0.89 | 0.04 |
| MBOAT2                  | membrane bound O-acyltransferase domain containing 2 | 0.87 | 0.01 |
| IER5                    | immediate early response 5                           | 0.87 | 0.01 |
| gene:ENSSSCG00000010278 |                                                      | 0.87 | 0.00 |
| FBLN5                   | fibulin 5                                            | 0.86 | 0.03 |
| CDKL1                   | cyclin dependent kinase like 1                       | 0.86 | 0.04 |
| PIM1                    | Pim-1 proto-oncogene, serine/threonine kinase        | 0.86 | 0.03 |
| ASB5                    | ankyrin repeat and SOCS box containing 5             | 0.86 | 0.00 |
| CYFIP2                  | cytoplasmic FMR1 interacting protein 2               | 0.86 | 0.02 |
| CCSAP                   | centriole, cilia and spindle associated protein      | 0.85 | 0.02 |
| MGARP                   | mitochondria localized glutamic acid rich protein    | 0.85 | 0.00 |
| RERG                    | RAS like estrogen regulated growth inhibitor         | 0.85 | 0.03 |
| gene:ENSSSCG00000008981 |                                                      | 0.84 | 0.01 |

|                         |                                                                          |      |      |
|-------------------------|--------------------------------------------------------------------------|------|------|
| RAB9B                   | RAB9B, member RAS oncogene family                                        | 0.84 | 0.01 |
| PLPP4                   | phospholipid phosphatase 4                                               | 0.84 | 0.02 |
| PDIA2                   | protein disulfide isomerase family A<br>member 2                         | 0.83 | 0.02 |
| gene:ENSSSCG00000034689 |                                                                          | 0.82 | 0.02 |
| gene:ENSSSCG00000003451 |                                                                          | 0.82 | 0.03 |
| SDR39U1                 | short chain dehydrogenase/reductase family<br>39U member 1               | 0.82 | 0.01 |
| PAK1                    | p21 (RAC1) activated kinase 1                                            | 0.82 | 0.04 |
| BTG2                    | BTG anti-proliferation factor 2                                          | 0.81 | 0.05 |
| FABP3                   | fatty acid binding protein 3                                             | 0.81 | 0.00 |
| ADRB2                   | adrenoceptor beta 2                                                      | 0.80 | 0.03 |
| GPC4                    | glypican 4                                                               | 0.80 | 0.01 |
| TWF2                    | twinfilin actin binding protein 2                                        | 0.80 | 0.00 |
| TCF21                   | transcription factor 21                                                  | 0.80 | 0.00 |
| gene:ENSSSCG00000035908 |                                                                          | 0.80 | 0.01 |
| VIPR2                   | vasoactive intestinal peptide receptor 2                                 | 0.79 | 0.04 |
| MYLK                    | myosin light chain kinase                                                | 0.79 | 0.02 |
| PIK3R6                  | phosphoinositide-3-kinase regulatory<br>subunit 6                        | 0.79 | 0.02 |
| LGALS1                  | galectin 1                                                               | 0.78 | 0.00 |
| C12orf75                | chromosome 12 open reading frame 75                                      | 0.78 | 0.03 |
| EFHC1                   | EF-hand domain containing 1                                              | 0.78 | 0.04 |
| GGA2                    | golgi associated, gamma adaptin ear<br>containing, ARF binding protein 2 | 0.78 | 0.00 |
| SYNC                    | syncoilin, intermediate filament protein                                 | 0.77 | 0.00 |
| GRAMD1C                 | GRAM domain containing 1C                                                | 0.77 | 0.05 |
| TSPAN9                  | tetraspanin 9                                                            | 0.77 | 0.00 |
| KLHL32                  | kelch like family member 32                                              | 0.77 | 0.02 |
| CXXC5                   | CXXC finger protein 5                                                    | 0.76 | 0.04 |
| NR4A2                   | nuclear receptor subfamily 4 group A<br>member 2                         | 0.76 | 0.01 |
| FRMD5                   | FERM domain containing 5                                                 | 0.76 | 0.02 |
| DCBLD2                  | discoidin, CUB and LCCL domain<br>containing 2                           | 0.76 | 0.03 |
| CDON                    | cell adhesion associated, oncogene<br>regulated                          | 0.75 | 0.02 |
| CSRNP1                  | cysteine and serine rich nuclear protein 1                               | 0.75 | 0.03 |



|                         |                                                          |      |      |
|-------------------------|----------------------------------------------------------|------|------|
| ABCC9                   | ATP binding cassette subfamily C member 9                | 0.75 | 0.00 |
| ASPN                    | asporin                                                  | 0.75 | 0.05 |
| gene:ENSSSCG00000035424 |                                                          | 0.74 | 0.00 |
| EPB41L5                 | erythrocyte membrane protein band 4.1 like 5             | 0.74 | 0.01 |
| ELL3                    | elongation factor for RNA polymerase II 3                | 0.72 | 0.04 |
| TINAGL1                 | tubulointerstitial nephritis antigen like 1              | 0.72 | 0.00 |
| RTN4RL1                 | reticulon 4 receptor like 1                              | 0.72 | 0.02 |
| DHRS4                   | dehydrogenase/reductase 4                                | 0.72 | 0.00 |
| CDKN2C                  | cyclin dependent kinase inhibitor 2C                     | 0.71 | 0.03 |
| SPCS3                   | signal peptidase complex subunit 3                       | 0.71 | 0.01 |
| LDHB                    | lactate dehydrogenase B                                  | 0.71 | 0.00 |
| SLC25A33                | solute carrier family 25 member 33                       | 0.71 | 0.03 |
| HDHD3                   | haloacid dehalogenase like hydrolase domain containing 3 | 0.70 | 0.05 |
| FAM81A                  | family with sequence similarity 81 member A              | 0.70 | 0.02 |
| ATP13A3                 | ATPase 13A3                                              | 0.69 | 0.00 |
| TCIM                    | transcriptional and immune response regulator            | 0.69 | 0.02 |
| F3                      | coagulation factor III, tissue factor                    | 0.69 | 0.02 |
| KLF4                    | Kruppel like factor 4                                    | 0.69 | 0.01 |
| AGA                     | aspartylglucosaminidase                                  | 0.69 | 0.01 |
| C22orf23                | chromosome 22 open reading frame 23                      | 0.68 | 0.03 |
| gene:ENSSSCG00000005623 |                                                          | 0.67 | 0.02 |
| ETV1                    | ETS variant 1                                            | 0.66 | 0.05 |
| CTSC                    | cathepsin C                                              | 0.66 | 0.00 |
| TNIK                    | TRAF2 and NCK interacting kinase                         | 0.66 | 0.03 |
| ALDH5A1                 | aldehyde dehydrogenase 5 family member A1                | 0.66 | 0.01 |
| MXRA7                   | matrix remodeling associated 7                           | 0.66 | 0.03 |
| HEBP1                   | heme binding protein 1                                   | 0.66 | 0.03 |
| PQLC1                   | PQ loop repeat containing 1                              | 0.66 | 0.01 |
| gene:ENSSSCG00000027013 |                                                          | 0.66 | 0.04 |
| SERTAD3                 | SERTA domain containing 3                                | 0.65 | 0.05 |
| CASQ1                   | calsequestrin 1                                          | 0.65 | 0.03 |
| ARHGAP18                | Rho GTPase activating protein 18                         | 0.65 | 0.01 |

|                         |                                                                    |      |      |
|-------------------------|--------------------------------------------------------------------|------|------|
| KLF10                   | Kruppel like factor 10                                             | 0.64 | 0.04 |
| SLC29A1                 | solute carrier family 29 member 1<br>(Augustine blood group)       | 0.64 | 0.00 |
| FBLIM1                  | filamin binding LIM protein 1                                      | 0.64 | 0.04 |
| HECW2                   | HECT, C2 and WW domain containing E3<br>ubiquitin protein ligase 2 | 0.63 | 0.03 |
| gene:ENSSSCG00000007749 |                                                                    | 0.63 | 0.03 |
| ARMC6                   | armadillo repeat containing 6                                      | 0.63 | 0.03 |
| PHF24                   | PHD finger protein 24                                              | 0.62 | 0.04 |
| PAH                     | phenylalanine hydroxylase                                          | 0.62 | 0.03 |
| ANTXR2                  | anthrax toxin receptor 2                                           | 0.62 | 0.00 |
| NIM1K                   | NIM1 serine/threonine protein kinase                               | 0.61 | 0.03 |
| PPP1R3B                 | protein phosphatase 1 regulatory subunit<br>3B                     | 0.61 | 0.04 |
| OMD                     | osteomodulin                                                       | 0.61 | 0.01 |
| LRRC10                  | leucine rich repeat containing 10                                  | 0.61 | 0.04 |
| SERPINB2                | serpin family B member 2                                           | 0.60 | 0.01 |
| CCNT1                   | cyclin T1                                                          | 0.60 | 0.00 |
| RHOBTB3                 | Rho related BTB domain containing 3                                | 0.60 | 0.02 |
| IGSF1                   | immunoglobulin superfamily member 1                                | 0.59 | 0.01 |
| SLCO3A1                 | solute carrier organic anion transporter<br>family member 3A1      | 0.59 | 0.02 |
| OLFML2A                 | olfactomedin like 2A                                               | 0.59 | 0.02 |
| gene:ENSSSCG00000031893 |                                                                    | 0.59 | 0.01 |
| LAMC2                   | laminin subunit gamma 2                                            | 0.59 | 0.04 |

**Supplemental Table S2.**

Selected signature Sus Scrofa gene expressions altered < 0.66-fold change (Log<sub>2</sub>FC (RVOT-VPC/sham control) < -0.58) in the left ventricular septal tissues of RVOT VPC group vs. sham control group at 6-month follow-up

| Symbol                 | Description                                                    | Log <sub>2</sub><br>FC | P<br>value |
|------------------------|----------------------------------------------------------------|------------------------|------------|
| CHI3L1                 | chitinase 3 like 1                                             | -8.03                  | 0.00       |
| gene:ENSSSCG0000003435 |                                                                | -7.98                  | 0.00       |
| 6                      |                                                                |                        |            |
| CCL20                  | C-C motif chemokine ligand 20                                  | -7.63                  | 0.00       |
| HYAL3                  | hyaluronoglucosaminidase 3                                     | -7.60                  | 0.00       |
| gene:ENSSSCG0000003957 |                                                                | -6.68                  | 0.01       |
| 4                      |                                                                |                        |            |
| LIPM                   | lipase family member M                                         | -6.51                  | 0.00       |
| CDHR1                  | cadherin related family member 1                               | -5.96                  | 0.00       |
| gene:ENSSSCG0000003980 |                                                                | -5.88                  | 0.02       |
| 3                      |                                                                |                        |            |
| gene:ENSSSCG0000003734 |                                                                | -5.82                  | 0.02       |
| 9                      |                                                                |                        |            |
| gene:ENSSSCG0000002069 |                                                                | -5.51                  | 0.00       |
| 5                      |                                                                |                        |            |
| RLBP1                  | retinaldehyde binding protein 1                                | -5.37                  | 0.00       |
| TNC                    | tenascin C                                                     | -4.61                  | 0.00       |
| CAPN6                  | calpain 6                                                      | -4.58                  | 0.00       |
| COMP                   | cartilage oligomeric matrix protein                            | -4.58                  | 0.01       |
| MYBPH                  | myosin binding protein H                                       | -4.44                  | 0.00       |
| MT1A                   | metallothionein 1A                                             | -4.40                  | 0.00       |
| PRSS35                 | protease, serine 35                                            | -4.32                  | 0.00       |
| CACNA1S                | calcium voltage-gated channel subunit<br>alpha1 S              | -4.15                  | 0.00       |
| gene:ENSSSCG0000003644 |                                                                | -4.01                  | 0.00       |
| 5                      |                                                                |                        |            |
| CTHRC1                 | collagen triple helix repeat containing 1                      | -3.94                  | 0.00       |
| FASLG                  | Fas ligand                                                     | -3.91                  | 0.00       |
| ISLR2                  | immunoglobulin superfamily containing<br>leucine rich repeat 2 | -3.89                  | 0.01       |
| NALCN                  | sodium leak channel, non-selective                             | -3.79                  | 0.00       |
| S100A8                 | S100 calcium binding protein A8                                | -3.75                  | 0.00       |

|                        |                                                    |       |      |
|------------------------|----------------------------------------------------|-------|------|
| gene:ENSSSCG0000003735 |                                                    | -3.75 | 0.00 |
| 8                      |                                                    |       |      |
| DEPDC1                 | DEP domain containing 1                            | -3.74 | 0.02 |
| gene:ENSSSCG0000004023 |                                                    | -3.59 | 0.03 |
| 6                      |                                                    |       |      |
| MELK                   | maternal embryonic leucine zipper kinase           | -3.58 | 0.02 |
| gene:ENSSSCG0000002491 |                                                    | -3.49 | 0.02 |
| 1                      |                                                    |       |      |
| gene:ENSSSCG0000002944 |                                                    | -3.43 | 0.01 |
| 9                      |                                                    |       |      |
| NKAIN3                 | sodium/potassium transporting ATPase interacting 3 | -3.40 | 0.03 |
| CPA1                   | carboxypeptidase A1                                | -3.38 | 0.00 |
| SLC9A3                 | solute carrier family 9 member A3                  | -3.36 | 0.00 |
| CENPA                  | centromere protein A                               | -3.31 | 0.03 |
| gene:ENSSSCG0000000637 |                                                    | -3.29 | 0.02 |
| 6                      |                                                    |       |      |
| ANKRD2                 | ankyrin repeat domain 2                            | -3.28 | 0.00 |
| CDCA8                  | cell division cycle associated 8                   | -3.23 | 0.00 |
| MATN4                  | matrilin 4                                         | -3.23 | 0.00 |
| GPRL15                 |                                                    | -3.22 | 0.03 |
| FAM83B                 | family with sequence similarity 83 member B        | -3.19 | 0.03 |
| CYP3A39                |                                                    | -3.16 | 0.00 |
| TSHR                   | thyroid stimulating hormone receptor               | -3.11 | 0.01 |
| S100A9                 | S100 calcium binding protein A9                    | -3.10 | 0.00 |
| MMP8                   | matrix metalloproteinase 8                         | -3.09 | 0.04 |
| GKN2                   | gastrophilin 2                                     | -2.94 | 0.03 |
| FREM1                  | FRAS1 related extracellular matrix 1               | -2.93 | 0.01 |
| S100A12                | S100 calcium binding protein A12                   | -2.92 | 0.00 |
| gene:ENSSSCG0000001583 |                                                    | -2.85 | 0.03 |
| 9                      |                                                    |       |      |
| ASF1B                  | anti-silencing function 1B histone chaperone       | -2.85 | 0.02 |
| DIAPH3                 | diaphanous related formin 3                        | -2.85 | 0.03 |
| CDT1                   | chromatin licensing and DNA replication factor 1   | -2.83 | 0.02 |

|                        |                                                        |       |      |
|------------------------|--------------------------------------------------------|-------|------|
| RELL2                  | RELT like 2                                            | -2.82 | 0.03 |
| gene:ENSSSCG0000003658 |                                                        | -2.79 | 0.04 |
| 6                      |                                                        |       |      |
| TAC4                   | tachykinin 4                                           | -2.79 | 0.04 |
| FADS6                  | fatty acid desaturase 6                                | -2.78 | 0.01 |
| gene:ENSSSCG0000003806 |                                                        | -2.77 | 0.00 |
| 8                      |                                                        |       |      |
| POSTN                  | periostin                                              | -2.74 | 0.00 |
| TGM3                   | transglutaminase 3                                     | -2.69 | 0.00 |
| gene:ENSSSCG0000000274 |                                                        | -2.69 | 0.00 |
| 9                      |                                                        |       |      |
| CDC6                   | cell division cycle 6                                  | -2.68 | 0.01 |
| AMCF-II                |                                                        | -2.66 | 0.02 |
| TMIGD1                 | transmembrane and immunoglobulin domain containing 1   | -2.66 | 0.03 |
| ANPEP                  | alanyl aminopeptidase, membrane                        | -2.60 | 0.00 |
| CRLF1                  | cytokine receptor like factor 1                        | -2.57 | 0.00 |
| gene:ENSSSCG0000003395 |                                                        | -2.55 | 0.03 |
| 8                      |                                                        |       |      |
| CENPL                  | centromere protein L                                   | -2.55 | 0.05 |
| FOXH1                  | forkhead box H1                                        | -2.49 | 0.02 |
| OLFM3                  | olfactomedin 3                                         | -2.49 | 0.05 |
| SELP                   | selectin P                                             | -2.48 | 0.00 |
| C6                     | complement C6                                          | -2.47 | 0.04 |
| PI15                   | peptidase inhibitor 15                                 | -2.42 | 0.00 |
| CDA                    | cytidine deaminase                                     | -2.42 | 0.01 |
| TOX                    | thymocyte selection associated high mobility group box | -2.40 | 0.02 |
| gene:ENSSSCG0000003103 |                                                        | -2.40 | 0.01 |
| 7                      |                                                        |       |      |
| CEMIP                  | cell migration inducing hyaluronan binding protein     | -2.37 | 0.04 |
| RASSF10                | Ras association domain family member 10                | -2.34 | 0.03 |
| CENPT                  | centromere protein T                                   | -2.33 | 0.02 |
| gene:ENSSSCG0000000934 |                                                        | -2.33 | 0.03 |
| 7                      |                                                        |       |      |
| CCL11                  | C-C motif chemokine ligand 11                          | -2.31 | 0.01 |

|                        |                                                   |       |      |
|------------------------|---------------------------------------------------|-------|------|
| gene:ENSSSCG0000003129 |                                                   | -2.30 | 0.04 |
| 2                      |                                                   |       |      |
| COL12A1                | collagen type XII alpha 1 chain                   | -2.29 | 0.00 |
| gene:ENSSSCG0000003922 |                                                   | -2.29 | 0.01 |
| 2                      |                                                   |       |      |
| C16orf54               | chromosome 16 open reading frame 54               | -2.29 | 0.05 |
| FAM180B                | family with sequence similarity 180 member B      | -2.29 | 0.05 |
| NLRP13                 | NLR family pyrin domain containing 13             | -2.28 | 0.00 |
| AMBN                   | ameloblastin                                      | -2.28 | 0.05 |
| TMEM59L                | transmembrane protein 59 like                     | -2.27 | 0.01 |
| TLR8                   | toll like receptor 8                              | -2.26 | 0.01 |
| TOP2A                  | DNA topoisomerase II alpha                        | -2.25 | 0.00 |
| TIMP1                  | TIMP metalloproteinase inhibitor 1                | -2.24 | 0.00 |
| DLGAP5                 | DLG associated protein 5                          | -2.23 | 0.02 |
| MMRN2                  | multimerin 2                                      | -2.22 | 0.00 |
| INHBA                  | inhibin beta A subunit                            | -2.21 | 0.00 |
| MSTN                   | myostatin                                         | -2.20 | 0.01 |
| ITGBL1                 | integrin subunit beta like 1                      | -2.19 | 0.02 |
| OLFML2B                | olfactomedin like 2B                              | -2.17 | 0.00 |
| gene:ENSSSCG0000003174 |                                                   | -2.16 | 0.01 |
| 1                      |                                                   |       |      |
| gene:ENSSSCG0000003855 |                                                   | -2.15 | 0.00 |
| 7                      |                                                   |       |      |
| SERTAD4                | SERTA domain containing 4                         | -2.14 | 0.00 |
| WNT2                   | Wnt family member 2                               | -2.14 | 0.03 |
| ACTG2                  | actin, gamma 2, smooth muscle, enteric            | -2.11 | 0.00 |
| KIF11                  | kinesin family member 11                          | -2.11 | 0.01 |
| MMP9                   | matrix metalloproteinase 9                        | -2.10 | 0.03 |
| FN1                    | fibronectin 1                                     | -2.10 | 0.00 |
| CP                     | ceruloplasmin                                     | -2.09 | 0.01 |
| ASPM                   | abnormal spindle microtubule assembly             | -2.08 | 0.04 |
| VWA5B2                 | von Willebrand factor A domain containing 5B2     | -2.08 | 0.01 |
| CLCA2                  | chloride channel accessory 2                      | -2.06 | 0.04 |
| BUB1B                  | BUB1 mitotic checkpoint serine/threonine kinase B | -2.05 | 0.04 |
| gene:ENSSSCG0000002225 |                                                   | -2.03 | 0.04 |

|                        |                                                                |       |      |
|------------------------|----------------------------------------------------------------|-------|------|
| 8                      |                                                                |       |      |
| gene:ENSSSCG0000002941 |                                                                | -2.03 | 0.01 |
| 4                      |                                                                |       |      |
| CENPF                  | centromere protein F                                           | -2.03 | 0.01 |
| TREML2                 | triggering receptor expressed on myeloid cells like 2          | -2.02 | 0.02 |
| HDC                    | histidine decarboxylase                                        | -2.01 | 0.04 |
| gene:ENSSSCG0000004035 |                                                                | -2.01 | 0.00 |
| 0                      |                                                                |       |      |
| ADAM12                 | ADAM metalloproteinase domain 12                               | -2.00 | 0.02 |
| HIVP3                  | human immunodeficiency virus type I enhancer binding protein 3 | -2.00 | 0.00 |
| gene:ENSSSCG0000002630 |                                                                | -1.99 | 0.00 |
| 2                      |                                                                |       |      |
| gene:ENSSSCG0000003046 |                                                                | -1.99 | 0.04 |
| 9                      |                                                                |       |      |
| LYZ                    | lysozyme                                                       | -1.98 | 0.00 |
| CDCA7L                 | cell division cycle associated 7 like                          | -1.98 | 0.00 |
| gene:ENSSSCG0000002332 |                                                                | -1.96 | 0.01 |
| 2                      |                                                                |       |      |
| GBX1                   | gastrulation brain homeobox 1                                  | -1.96 | 0.04 |
| KCNJ5                  | potassium voltage-gated channel subfamily J member 5           | -1.94 | 0.00 |
| gene:ENSSSCG0000000284 |                                                                | -1.94 | 0.02 |
| 9                      |                                                                |       |      |
| HTR2B                  | 5-hydroxytryptamine receptor 2B                                | -1.93 | 0.04 |
| CPXM1                  | carboxypeptidase X, M14 family member 1                        | -1.92 | 0.00 |
| FGFR2                  | fibroblast growth factor receptor 2                            | -1.91 | 0.01 |
| TBC1D10C               | TBC1 domain family member 10C                                  | -1.91 | 0.00 |
| gene:ENSSSCG0000003721 |                                                                | -1.89 | 0.02 |
| 4                      |                                                                |       |      |
| BAALC                  | BAALC, MAP3K1 and KLF4 binding                                 | -1.88 | 0.00 |
| gene:ENSSSCG0000001378 |                                                                | -1.86 | 0.00 |
| 8                      |                                                                |       |      |
| CDCA5                  | cell division cycle associated 5                               | -1.85 | 0.02 |
| PVRIG                  | PVR related immunoglobulin domain containing                   | -1.85 | 0.04 |

|                        |                                                     |       |      |
|------------------------|-----------------------------------------------------|-------|------|
| gene:ENSSSCG0000003030 |                                                     | -1.85 | 0.00 |
| 0                      |                                                     |       |      |
| UBE2C                  | ubiquitin conjugating enzyme E2 C                   | -1.81 | 0.03 |
| CD69                   | CD69 molecule                                       | -1.80 | 0.00 |
| DDAH1                  | dimethylarginine<br>dimethylaminohydrolase 1        | -1.80 | 0.00 |
| MEGF11                 | multiple EGF like domains 11                        | -1.80 | 0.03 |
| gene:ENSSSCG0000001645 |                                                     | -1.79 | 0.01 |
| 1                      |                                                     |       |      |
| NLRP11                 | NLR family pyrin domain containing 11               | -1.78 | 0.02 |
| LIF                    | LIF, interleukin 6 family cytokine                  | -1.77 | 0.04 |
| gene:ENSSSCG0000002096 |                                                     | -1.69 | 0.02 |
| 7                      |                                                     |       |      |
| ANGPTL7                | angiopoietin like 7                                 | -1.68 | 0.05 |
| gene:ENSSSCG0000002869 |                                                     | -1.67 | 0.03 |
| 5                      |                                                     |       |      |
| CX3CR1                 | C-X3-C motif chemokine receptor 1                   | -1.67 | 0.02 |
| CHRNA4                 | cholinergic receptor nicotinic alpha 4<br>subunit   | -1.67 | 0.02 |
| FAM198A                | family with sequence similarity 198<br>member A     | -1.66 | 0.02 |
| SLC11A1                | solute carrier family 11 member 1                   | -1.66 | 0.04 |
| SH2D1A                 | SH2 domain containing 1A                            | -1.64 | 0.04 |
| GZMA_2                 |                                                     | -1.64 | 0.04 |
| GFRA3                  | GDNF family receptor alpha 3                        | -1.62 | 0.01 |
| gene:ENSSSCG0000001273 |                                                     | -1.62 | 0.02 |
| 3                      |                                                     |       |      |
| VCAN                   | versican                                            | -1.62 | 0.00 |
| COL6A6                 | collagen type VI alpha 6 chain                      | -1.62 | 0.00 |
| DNAJC6                 | DnaJ heat shock protein family (Hsp40)<br>member C6 | -1.61 | 0.01 |
| ATP8                   | ATP synthase F0 subunit 8                           | -1.61 | 0.04 |
| gene:ENSSSCG0000002189 |                                                     | -1.60 | 0.02 |
| 9                      |                                                     |       |      |
| TNFRSF11B              | TNF receptor superfamily member 11b                 | -1.58 | 0.04 |
| COL8A1                 | collagen type VIII alpha 1 chain                    | -1.58 | 0.00 |
| HGF                    | hepatocyte growth factor                            | -1.57 | 0.01 |
| gene:ENSSSCG0000001021 |                                                     | -1.57 | 0.04 |



---

|                        |                                                      |       |      |
|------------------------|------------------------------------------------------|-------|------|
| 4                      |                                                      |       |      |
| gene:ENSSSCG0000003682 |                                                      | -1.55 | 0.03 |
| 2                      |                                                      |       |      |
| PYGO1                  | pygopus family PHD finger 1                          | -1.55 | 0.03 |
| MRAP2                  | melanocortin 2 receptor accessory<br>protein 2       | -1.55 | 0.05 |
| MT3                    | metallothionein 3                                    | -1.55 | 0.00 |
| GLRB                   | glycine receptor beta                                | -1.54 | 0.05 |
| gene:ENSSSCG0000003910 |                                                      | -1.54 | 0.04 |
| 7                      |                                                      |       |      |
| gene:ENSSSCG0000003634 |                                                      | -1.54 | 0.04 |
| 8                      |                                                      |       |      |
| gene:ENSSSCG0000002665 |                                                      | -1.54 | 0.02 |
| 3                      |                                                      |       |      |
| PANX1                  | pannexin 1                                           | -1.52 | 0.02 |
| PHGDH                  | phosphoglycerate dehydrogenase                       | -1.51 | 0.02 |
| MYO1G                  | myosin IG                                            | -1.51 | 0.01 |
| gene:ENSSSCG0000003485 |                                                      | -1.51 | 0.00 |
| 3                      |                                                      |       |      |
| gene:ENSSSCG0000001094 |                                                      | -1.50 | 0.02 |
| 8                      |                                                      |       |      |
| gene:ENSSSCG0000002834 |                                                      | -1.50 | 0.00 |
| 1                      |                                                      |       |      |
| SDC1                   | syndecan 1                                           | -1.50 | 0.03 |
| BGN                    | biglycan                                             | -1.48 | 0.00 |
| CLEC11A                | C-type lectin domain containing 11A                  | -1.46 | 0.05 |
| CCL5                   | C-C motif chemokine ligand 5                         | -1.46 | 0.01 |
| TCF7                   | transcription factor 7                               | -1.45 | 0.04 |
| CDH24                  | cadherin 24                                          | -1.45 | 0.00 |
| gene:ENSSSCG0000000921 |                                                      | -1.44 | 0.00 |
| 3                      |                                                      |       |      |
| PHLDB3                 | pleckstrin homology like domain family<br>B member 3 | -1.43 | 0.03 |
| SLC9A3R1               | SLC9A3 regulator 1                                   | -1.42 | 0.00 |
| MSC                    | musculin                                             | -1.42 | 0.01 |
| C15orf48               | chromosome 15 open reading frame 48                  | -1.41 | 0.04 |
| IGF1                   | insulin like growth factor 1                         | -1.39 | 0.02 |
| TJP3                   | tight junction protein 3                             | -1.38 | 0.03 |

---

|                             |                                                                  |       |      |
|-----------------------------|------------------------------------------------------------------|-------|------|
| IQGAP3                      | IQ motif containing GTPase activating protein 3                  | -1.37 | 0.05 |
| B3GNT8                      | UDP-GlcNAc:betaGal<br>beta-1,3-N-acetylglucosaminyltransferase 8 | -1.37 | 0.03 |
| PRRX1                       | paired related homeobox 1                                        | -1.37 | 0.00 |
| FAM43B                      | family with sequence similarity 43 member B                      | -1.36 | 0.04 |
| COL3A1                      | collagen type III alpha 1 chain                                  | -1.36 | 0.00 |
| SLPI                        | secretory leukocyte peptidase inhibitor                          | -1.36 | 0.00 |
| PLCB2                       | phospholipase C beta 2                                           | -1.34 | 0.02 |
| LPXN                        | leupaxin                                                         | -1.33 | 0.05 |
| MBP                         | myelin basic protein                                             | -1.32 | 0.02 |
| COL1A1                      | collagen type I alpha 1 chain                                    | -1.32 | 0.00 |
| NEB                         | nebulin                                                          | -1.32 | 0.05 |
| F13A1                       | coagulation factor XIII A chain                                  | -1.32 | 0.01 |
| GIMAP8                      | GTPase, IMAP family member 8                                     | -1.30 | 0.03 |
| gene:ENSSSCG0000000889<br>8 |                                                                  | -1.30 | 0.00 |
| ALDH1A3                     | aldehyde dehydrogenase 1 family member A3                        | -1.29 | 0.01 |
| PCSK5                       | proprotein convertase subtilisin/kexin type 5                    | -1.28 | 0.01 |
| ITGA4                       | integrin subunit alpha 4                                         | -1.28 | 0.01 |
| PAK3                        | p21 (RAC1) activated kinase 3                                    | -1.28 | 0.04 |
| CCR1                        | C-C motif chemokine receptor 1                                   | -1.27 | 0.04 |
| SESN2                       | sestrin 2                                                        | -1.27 | 0.01 |
| NTRK2                       | neurotrophic receptor tyrosine kinase 2                          | -1.26 | 0.04 |
| GNLY                        | granulysin                                                       | -1.26 | 0.00 |
| INPP1                       | inositol polyphosphate-1-phosphatase                             | -1.25 | 0.00 |
| CD3E                        | CD3e molecule                                                    | -1.24 | 0.02 |
| RUNX1                       | runt related transcription factor 1                              | -1.23 | 0.03 |
| DPH1                        | diphthamide biosynthesis 1                                       | -1.23 | 0.01 |
| CCDC80                      | coiled-coil domain containing 80                                 | -1.22 | 0.00 |
| ZNF683                      | zinc finger protein 683                                          | -1.20 | 0.03 |
| ZNF503                      | zinc finger protein 503                                          | -1.20 | 0.00 |
| DNAH8                       | dynein axonemal heavy chain 8                                    | -1.19 | 0.01 |
| LAX1                        | lymphocyte transmembrane adaptor 1                               | -1.19 | 0.05 |

|                        |                                                            |       |      |
|------------------------|------------------------------------------------------------|-------|------|
| gene:ENSSSCG0000002969 |                                                            | -1.18 | 0.01 |
| 6                      |                                                            |       |      |
| gene:ENSSSCG0000000483 |                                                            | -1.14 | 0.02 |
| 0                      |                                                            |       |      |
| SERPINE2               | serpin family E member 2                                   | -1.14 | 0.05 |
| CAPG                   | capping actin protein, gelsolin like                       | -1.14 | 0.04 |
| THEMIS2                | thymocyte selection associated family member 2             | -1.14 | 0.03 |
| PLEKHB1                | pleckstrin homology domain containing B1                   | -1.13 | 0.04 |
| PTGER2                 | prostaglandin E receptor 2                                 | -1.13 | 0.00 |
| GALNT16                | polypeptide N-acetylgalactosaminyltransferase 16           | -1.11 | 0.02 |
| ABI3BP                 | ABI family member 3 binding protein                        | -1.11 | 0.01 |
| S100A6                 | S100 calcium binding protein A6                            | -1.10 | 0.01 |
| GIMAP7                 | GTPase, IMAP family member 7                               | -1.09 | 0.03 |
| gene:ENSSSCG0000001343 |                                                            | -1.08 | 0.04 |
| 4                      |                                                            |       |      |
| COL1A2                 | collagen type I alpha 2 chain                              | -1.08 | 0.01 |
| SLCO2A1                | solute carrier organic anion transporter family member 2A1 | -1.05 | 0.00 |
| MYOF                   | myoferlin                                                  | -1.05 | 0.00 |
| CD8A                   | CD8a molecule                                              | -1.03 | 0.05 |
| KIF21B                 | kinesin family member 21B                                  | -1.03 | 0.04 |
| CD52                   | CD52 molecule                                              | -1.03 | 0.05 |
| ARHGAP4                | Rho GTPase activating protein 4                            | -1.02 | 0.02 |
| UBASH3B                | ubiquitin associated and SH3 domain containing B           | -1.01 | 0.01 |
| gene:ENSSSCG0000003525 |                                                            | -1.01 | 0.02 |
| 6                      |                                                            |       |      |
| gene:ENSSSCG0000002782 |                                                            | -1.00 | 0.01 |
| 6                      |                                                            |       |      |
| TTC38                  | tetratricopeptide repeat domain 38                         | -0.99 | 0.03 |
| FMOD                   | fibromodulin                                               | -0.98 | 0.04 |
| PLVAP                  | plasmalemma vesicle associated protein                     | -0.98 | 0.00 |
| PPIC                   | peptidylprolyl isomerase C                                 | -0.97 | 0.02 |
| gene:ENSSSCG0000003328 |                                                            | -0.97 | 0.04 |
| 6                      |                                                            |       |      |

|                             |                                                        |       |      |
|-----------------------------|--------------------------------------------------------|-------|------|
| FUT4                        | fucosyltransferase 4                                   | -0.97 | 0.05 |
| THPO                        | thrombopoietin                                         | -0.97 | 0.02 |
| PLEKHA6                     | pleckstrin homology domain containing<br>A6            | -0.96 | 0.00 |
| PTPRC                       | protein tyrosine phosphatase, receptor<br>type C       | -0.95 | 0.01 |
| COL6A3                      | collagen type VI alpha 3 chain                         | -0.95 | 0.00 |
| SFRP4                       | secreted frizzled related protein 4                    | -0.94 | 0.05 |
| FBF1                        | Fas binding factor 1                                   | -0.93 | 0.00 |
| DOCK8                       | dedicator of cytokinesis 8                             | -0.93 | 0.04 |
| KIAA1211                    | KIAA1211                                               | -0.92 | 0.03 |
| gene:ENSSSCG0000003308<br>9 |                                                        | -0.92 | 0.03 |
| PI16                        | peptidase inhibitor 16                                 | -0.91 | 0.02 |
| CD109                       | CD109 molecule                                         | -0.91 | 0.05 |
| IGFBP2                      | insulin like growth factor binding protein<br>2        | -0.90 | 0.05 |
| PIEZO1                      | piezo type mechanosensitive ion channel<br>component 1 | -0.90 | 0.01 |
| COL14A1                     | collagen type XIV alpha 1 chain                        | -0.90 | 0.02 |
| PMEPA1                      | prostate transmembrane protein,<br>androgen induced 1  | -0.90 | 0.01 |
| NHSL1                       | NHS like 1                                             | -0.90 | 0.01 |
| LPCAT4                      | lysophosphatidylcholine acyltransferase<br>4           | -0.89 | 0.00 |
| THBS3                       | thrombospondin 3                                       | -0.89 | 0.04 |
| SEMA3F                      | semaphorin 3F                                          | -0.88 | 0.03 |
| NLRC5                       | NLR family CARD domain containing 5                    | -0.88 | 0.02 |
| MAP1B                       | microtubule associated protein 1B                      | -0.88 | 0.00 |
| NSG1                        | neuronal vesicle trafficking associated 1              | -0.88 | 0.05 |
| RAC2                        | Rac family small GTPase 2                              | -0.88 | 0.04 |
| APAF1                       | apoptotic peptidase activating factor 1                | -0.88 | 0.02 |
| POC5                        | POC5 centriolar protein                                | -0.87 | 0.03 |
| SHANK3                      | SH3 and multiple ankyrin repeat<br>domains 3           | -0.86 | 0.02 |
| gene:ENSSSCG0000000743<br>5 |                                                        | -0.85 | 0.05 |
| CHRD                        | chordin                                                | -0.84 | 0.02 |

|                        |                                                                |       |      |
|------------------------|----------------------------------------------------------------|-------|------|
| SERTM1                 | serine rich and transmembrane domain containing 1              | -0.83 | 0.02 |
| ASS1                   | argininosuccinate synthase 1                                   | -0.83 | 0.01 |
| HIVEP2                 | human immunodeficiency virus type I enhancer binding protein 2 | -0.82 | 0.00 |
| ZHX2                   | zinc fingers and homeoboxes 2                                  | -0.82 | 0.01 |
| ZBTB40                 | zinc finger and BTB domain containing 40                       | -0.82 | 0.03 |
| MAST4                  | microtubule associated serine/threonine kinase family member 4 | -0.81 | 0.01 |
| CORO2B                 | coronin 2B                                                     | -0.80 | 0.02 |
| MX2                    | MX dynamin like GTPase 2                                       | -0.80 | 0.01 |
| TLNRD1                 | talin rod domain containing 1                                  | -0.79 | 0.01 |
| CORO1A                 | coronin 1A                                                     | -0.79 | 0.02 |
| MPP3                   | membrane palmitoylated protein 3                               | -0.79 | 0.00 |
| GXYLT1                 | glucoside xylosyltransferase 1                                 | -0.78 | 0.03 |
| L1CAM                  | L1 cell adhesion molecule                                      | -0.78 | 0.03 |
| RNF213                 | ring finger protein 213                                        | -0.78 | 0.03 |
| TNS2                   | tensin 2                                                       | -0.77 | 0.01 |
| PANK1                  | pantothenate kinase 1                                          | -0.77 | 0.02 |
| gene:ENSSSCG0000000139 |                                                                | -0.77 | 0.02 |
| 6                      |                                                                |       |      |
| IFIT2                  | interferon induced protein with tetratricopeptide repeats 2    | -0.76 | 0.01 |
| EHBP1L1                | EH domain binding protein 1 like 1                             | -0.76 | 0.02 |
| AGRN                   | agrin                                                          | -0.76 | 0.03 |
| TYK2                   | tyrosine kinase 2                                              | -0.76 | 0.00 |
| gene:ENSSSCG0000004033 |                                                                | -0.76 | 0.03 |
| 7                      |                                                                |       |      |
| SYVN1                  | synoviolin 1                                                   | -0.76 | 0.01 |
| PFKP                   | phosphofructokinase, platelet                                  | -0.75 | 0.00 |
| F8                     | coagulation factor VIII                                        | -0.75 | 0.00 |
| GTSE1                  | G2 and S-phase expressed 1                                     | -0.74 | 0.03 |
| SPARC                  | secreted protein acidic and cysteine rich                      | -0.74 | 0.05 |
| PLEKHG5                | pleckstrin homology and RhoGEF domain containing G5            | -0.74 | 0.03 |
| MAP3K12                | mitogen-activated protein kinase kinase kinase 12              | -0.73 | 0.05 |

|                             |                                                                               |       |      |
|-----------------------------|-------------------------------------------------------------------------------|-------|------|
| TSPO                        | translocator protein                                                          | -0.73 | 0.03 |
| NADSYN1                     | NAD synthetase 1                                                              | -0.73 | 0.02 |
| RECK                        | reversion inducing cysteine rich protein<br>with kazal motifs                 | -0.72 | 0.04 |
| CTSW                        | cathepsin W                                                                   | -0.72 | 0.03 |
| gene:ENSSSCG0000003826<br>0 |                                                                               | -0.72 | 0.03 |
| HERC6                       | HECT and RLD domain containing E3<br>ubiquitin protein ligase family member 6 | -0.71 | 0.04 |
| gene:ENSSSCG0000000929<br>3 |                                                                               | -0.70 | 0.03 |
| TNFRSF19                    | TNF receptor superfamily member 19                                            | -0.70 | 0.03 |
| COL5A1                      | collagen type V alpha 1 chain                                                 | -0.69 | 0.04 |
| ITGB2                       | integrin subunit beta 2                                                       | -0.68 | 0.05 |
| COL5A2                      | collagen type V alpha 2 chain                                                 | -0.68 | 0.04 |
| PHRF1                       | PHD and ring finger domains 1                                                 | -0.68 | 0.03 |
| PCDHGA9                     | protocadherin gamma subfamily A, 9                                            | -0.68 | 0.04 |
| EBF3                        | early B cell factor 3                                                         | -0.68 | 0.03 |
| TCIRG1                      | T cell immune regulator 1, ATPase H+<br>transporting V0 subunit a3            | -0.68 | 0.03 |
| SLC5A6                      | solute carrier family 5 member 6                                              | -0.68 | 0.01 |
| B3GLCT                      | beta 3-glucosyltransferase                                                    | -0.68 | 0.04 |
| SRRM2                       | serine/arginine repetitive matrix 2                                           | -0.67 | 0.00 |
| NOS3                        | nitric oxide synthase 3                                                       | -0.67 | 0.04 |
| PLAT                        | plasminogen activator, tissue type                                            | -0.67 | 0.05 |
| IGFBP4                      | insulin like growth factor binding protein<br>4                               | -0.67 | 0.05 |
| MTMR4                       | myotubularin related protein 4                                                | -0.66 | 0.01 |
| ABCC10                      | ATP binding cassette subfamily C<br>member 10                                 | -0.66 | 0.01 |
| SBNO2                       | strawberry notch homolog 2                                                    | -0.66 | 0.03 |
| DPH2                        | DPH2 homolog                                                                  | -0.66 | 0.04 |
| RAP1GDS1                    | Rap1 GTPase-GDP dissociation<br>stimulator 1                                  | -0.66 | 0.03 |
| ING5                        | inhibitor of growth family member 5                                           | -0.66 | 0.02 |
| FHOD1                       | formin homology 2 domain containing 1                                         | -0.66 | 0.03 |
| KAT7                        | lysine acetyltransferase 7                                                    | -0.66 | 0.03 |
| IL4R                        | interleukin 4 receptor                                                        | -0.65 | 0.02 |

|                         |                                                               |       |      |
|-------------------------|---------------------------------------------------------------|-------|------|
| EPB41L4B                | erythrocyte membrane protein band 4.1 like 4B                 | -0.65 | 0.04 |
| ADCK5                   | aarF domain containing kinase 5                               | -0.65 | 0.04 |
| ABLIM2                  | actin binding LIM protein family member 2                     | -0.65 | 0.01 |
| PEAR1                   | platelet endothelial aggregation receptor 1                   | -0.65 | 0.02 |
| STARD9                  | StAR related lipid transfer domain containing 9               | -0.64 | 0.03 |
| gene:ENSSSCG00000037530 |                                                               | -0.64 | 0.03 |
| KAT6B                   | lysine acetyltransferase 6B                                   | -0.64 | 0.02 |
| CHD7                    | chromodomain helicase DNA binding protein 7                   | -0.63 | 0.02 |
| JAG1                    | jagged 1                                                      | -0.63 | 0.02 |
| RAPGEF5                 | Rap guanine nucleotide exchange factor 5                      | -0.63 | 0.02 |
| ZC3H18                  | zinc finger CCCH-type containing 18                           | -0.62 | 0.04 |
| LAMA5                   | laminin subunit alpha 5                                       | -0.62 | 0.04 |
| UNK                     | unkempt family zinc finger                                    | -0.62 | 0.04 |
| BRPF3                   | bromodomain and PHD finger containing 3                       | -0.61 | 0.03 |
| CIC                     | capicua transcriptional repressor                             | -0.61 | 0.02 |
| HRH1                    | histamine receptor H1                                         | -0.61 | 0.02 |
| CCDC6                   | coiled-coil domain containing 6                               | -0.61 | 0.04 |
| DLG5                    | discs large MAGUK scaffold protein 5                          | -0.61 | 0.04 |
| CREBBP                  | CREB binding protein                                          | -0.61 | 0.04 |
| HAUS5                   | HAUS augmin like complex subunit 5                            | -0.60 | 0.02 |
| B3GNT3                  | UDP-GlcNAc:betaGal beta-1,3-N-acetylglucosaminyltransferase 3 | -0.60 | 0.02 |
| PGD                     | phosphogluconate dehydrogenase                                | -0.60 | 0.03 |
| TMEM2                   | transmembrane protein 2                                       | -0.60 | 0.05 |
| CARD10                  | caspase recruitment domain family member 10                   | -0.60 | 0.04 |
| EP300                   | E1A binding protein p300                                      | -0.60 | 0.01 |
| gene:ENSSSCG00000028278 |                                                               | -0.59 | 0.03 |

|         |                                                       |       |      |
|---------|-------------------------------------------------------|-------|------|
| HSPG2   | heparan sulfate proteoglycan 2                        | -0.59 | 0.01 |
| MCF2L   | MCF.2 cell line derived transforming<br>sequence like | -0.59 | 0.03 |
| ATG2A   | autophagy related 2A                                  | -0.59 | 0.02 |
| ZFP36L1 | ZFP36 ring finger protein like 1                      | -0.59 | 0.03 |



**Supplemental Table S3.**

Selected signature Sus Scrofa gene expressions altered > 1.5-fold change (Log<sub>2</sub>FC (RVOT-VPC/sham control) > 0.58) in the left ventricular free wall tissues of RVOT VPC group vs. sham control group at 6-month follow-up

| Symbol                      | Description                                                    | Log <sub>2</sub><br>FC | P<br>value |
|-----------------------------|----------------------------------------------------------------|------------------------|------------|
| gene:ENSSSCG0000003632<br>4 |                                                                | 5.81                   | 0.02       |
| UBXN10                      | UBX domain protein 10                                          | 5.66                   | 0.02       |
| TSNAXIP1                    | translin associated factor X interacting<br>protein 1          | 5.16                   | 0.04       |
| gene:ENSSSCG0000003810<br>1 |                                                                | 4.94                   | 0.04       |
| SYT1                        | synaptotagmin 1                                                | 4.39                   | 0.00       |
| SCN3B                       | sodium voltage-gated channel beta<br>subunit 3                 | 3.81                   | 0.00       |
| OAZ3                        | ornithine decarboxylase antizyme 3                             | 3.80                   | 0.00       |
| PDYN                        | prodynorphin                                                   | 3.70                   | 0.00       |
| WWC1                        | WW and C2 domain containing 1                                  | 3.65                   | 0.00       |
| UMODL1                      | uromodulin like 1                                              | 3.44                   | 0.00       |
| GDNF                        | glial cell derived neurotrophic factor                         | 3.34                   | 0.00       |
| MDGA2                       | MAM domain containing<br>glycosylphosphatidylinositol anchor 2 | 3.29                   | 0.04       |
| gene:ENSSSCG0000003522<br>6 |                                                                | 3.28                   | 0.03       |
| SH3GL3                      | SH3 domain containing GRB2 like 3,<br>endophilin A3            | 3.27                   | 0.02       |
| CTNND2                      | catenin delta 2                                                | 3.08                   | 0.00       |
| SYT5                        | synaptotagmin 5                                                | 3.05                   | 0.03       |
| gene:ENSSSCG0000000820<br>5 |                                                                | 2.93                   | 0.01       |
| gene:ENSSSCG0000001746<br>3 |                                                                | 2.80                   | 0.04       |
| IRX1                        | iroquois homeobox 1                                            | 2.76                   | 0.02       |
| SYPL2                       | synaptophysin like 2                                           | 2.67                   | 0.00       |
| CPNE6                       | copine 6                                                       | 2.67                   | 0.02       |
| gene:ENSSSCG0000003001<br>3 |                                                                | 2.67                   | 0.02       |

|                             |                                                                  |      |      |
|-----------------------------|------------------------------------------------------------------|------|------|
| PTGS2                       | prostaglandin-endoperoxide synthase 2                            | 2.64 | 0.00 |
| VSIG2                       | V-set and immunoglobulin domain<br>containing 2                  | 2.62 | 0.00 |
| FOSB                        | FosB proto-oncogene, AP-1<br>transcription factor subunit        | 2.62 | 0.00 |
| SLN                         | sarcolipin                                                       | 2.61 | 0.00 |
| ARC                         | activity regulated cytoskeleton<br>associated protein            | 2.59 | 0.01 |
| gene:ENSSSCG0000000002<br>1 |                                                                  | 2.58 | 0.02 |
| SLC18A1                     | solute carrier family 18 member A1                               | 2.58 | 0.02 |
| gene:ENSSSCG0000003869<br>0 |                                                                  | 2.57 | 0.03 |
| gene:ENSSSCG0000004019<br>8 |                                                                  | 2.55 | 0.03 |
| IRX2                        | iroquois homeobox 2                                              | 2.50 | 0.00 |
| KCNQ2                       | potassium voltage-gated channel<br>modifier subfamily G member 2 | 2.48 | 0.03 |
| RGS6                        | regulator of G protein signaling 6                               | 2.47 | 0.00 |
| RIMBP2                      | RIMS binding protein 2                                           | 2.43 | 0.00 |
| gene:ENSSSCG0000003610<br>9 |                                                                  | 2.43 | 0.02 |
| CCDC190                     | coiled-coil domain containing 190                                | 2.40 | 0.02 |
| gene:ENSSSCG0000002127<br>1 |                                                                  | 2.38 | 0.00 |
| IRX6                        | iroquois homeobox 6                                              | 2.37 | 0.00 |
| gene:ENSSSCG0000001076<br>4 |                                                                  | 2.32 | 0.02 |
| GPT2                        | glutamic--pyruvic transaminase 2                                 | 2.31 | 0.02 |
| UNC13A                      | unc-13 homolog A                                                 | 2.30 | 0.00 |
| gene:ENSSSCG0000000896<br>5 |                                                                  | 2.29 | 0.04 |
| EGR1                        | early growth response 1                                          | 2.28 | 0.00 |
| UGT8                        | UDP glycosyltransferase 8                                        | 2.26 | 0.05 |
| TRIM46                      | tripartite motif containing 46                                   | 2.26 | 0.04 |
| ATCAY                       | ATCAY, caytaxin                                                  | 2.26 | 0.05 |
| gene:ENSSSCG0000002986<br>6 |                                                                  | 2.26 | 0.00 |

|                         |                                                         |      |      |
|-------------------------|---------------------------------------------------------|------|------|
| gene:ENSSSCG0000000155  |                                                         | 2.25 | 0.03 |
| 0                       |                                                         |      |      |
| SLC28A1                 | solute carrier family 28 member 1                       | 2.24 | 0.01 |
| CCL2                    | C-C motif chemokine ligand 2                            | 2.24 | 0.00 |
| NNAT                    | neuronatin                                              | 2.24 | 0.00 |
| IL1RL2                  | interleukin 1 receptor like 2                           | 2.21 | 0.03 |
| DKK3                    | dickkopf WNT signaling pathway inhibitor 3              | 2.20 | 0.00 |
| NPPB                    | natriuretic peptide B                                   | 2.20 | 0.00 |
| CENPS                   | centromere protein S                                    | 2.18 | 0.01 |
| ATF3                    | activating transcription factor 3                       | 2.16 | 0.00 |
| GPR156                  | G protein-coupled receptor 156                          | 2.16 | 0.03 |
| PADI2                   | peptidyl arginine deiminase 2                           | 2.15 | 0.00 |
| IL13RA2                 | interleukin 13 receptor subunit alpha 2                 | 2.14 | 0.02 |
| DUSP5                   | dual specificity phosphatase 5                          | 2.13 | 0.00 |
| CSGALNACT1              | chondroitin sulfate N-acetylgalactosaminyltransferase 1 | 2.10 | 0.01 |
| IL23A                   | interleukin 23 subunit alpha                            | 2.10 | 0.04 |
| OSR2                    | odd-skipped related transcription factor 2              | 2.08 | 0.00 |
| CD209                   | CD209 molecule                                          | 2.07 | 0.00 |
| GRAMD1B                 | GRAM domain containing 1B                               | 2.07 | 0.00 |
| UBE2C                   | ubiquitin conjugating enzyme E2 C                       | 2.07 | 0.05 |
| CXCL2                   | C-X-C motif chemokine ligand 2                          | 2.07 | 0.00 |
| gene:ENSSSCG00000004093 |                                                         | 2.06 | 0.02 |
| 9                       |                                                         |      |      |
| MYL4                    | myosin light chain 4                                    | 2.06 | 0.00 |
| gene:ENSSSCG00000003199 |                                                         | 2.05 | 0.04 |
| 7                       |                                                         |      |      |
| NIPAL4                  | NIPA like domain containing 4                           | 2.03 | 0.02 |
| gene:ENSSSCG00000003906 |                                                         | 2.01 | 0.04 |
| 6                       |                                                         |      |      |
| LRRN1                   | leucine rich repeat neuronal 1                          | 2.00 | 0.02 |
| gene:ENSSSCG00000002340 |                                                         | 2.00 | 0.01 |
| 3                       |                                                         |      |      |
| GDF10                   | growth differentiation factor 10                        | 1.99 | 0.02 |
| CDCA7                   | cell division cycle associated 7                        | 1.99 | 0.02 |
| CDH12                   | cadherin 12                                             | 1.98 | 0.01 |

|                        |                                                                     |      |      |
|------------------------|---------------------------------------------------------------------|------|------|
| SOCS3                  | suppressor of cytokine signaling 3                                  | 1.97 | 0.00 |
| ARG2                   | arginase 2                                                          | 1.95 | 0.00 |
| gene:ENSSSCG0000004045 |                                                                     | 1.95 | 0.00 |
| 3                      |                                                                     |      |      |
| KEL                    | Kell blood group,<br>metallo-endorpeptidase                         | 1.94 | 0.03 |
| SLC9A2                 | solute carrier family 9 member A2                                   | 1.93 | 0.00 |
| TRPV5                  | transient receptor potential cation<br>channel subfamily V member 5 | 1.93 | 0.03 |
| TNNI1                  | troponin I1, slow skeletal type                                     | 1.92 | 0.01 |
| gene:ENSSSCG0000003921 |                                                                     | 1.87 | 0.04 |
| 4                      |                                                                     |      |      |
| NPPA                   | natriuretic peptide A                                               | 1.85 | 0.00 |
| gene:ENSSSCG0000001132 |                                                                     | 1.85 | 0.00 |
| 4                      |                                                                     |      |      |
| SPDEF                  | SAM pointed domain containing ETS<br>transcription factor           | 1.84 | 0.01 |
| SLC15A2                | solute carrier family 15 member 2                                   | 1.83 | 0.02 |
| STRC                   | stereocilin                                                         | 1.82 | 0.00 |
| ROR1                   | receptor tyrosine kinase like orphan<br>receptor 1                  | 1.82 | 0.00 |
| HBM                    | hemoglobin subunit mu                                               | 1.82 | 0.05 |
| SMCO1                  | single-pass membrane protein with<br>coiled-coil domains 1          | 1.81 | 0.01 |
| gene:ENSSSCG0000001427 |                                                                     | 1.81 | 0.00 |
| 2                      |                                                                     |      |      |
| gene:ENSSSCG0000003835 |                                                                     | 1.81 | 0.01 |
| 7                      |                                                                     |      |      |
| MNS1                   | meiosis specific nuclear structural 1                               | 1.81 | 0.00 |
| IFN-OMEGA-7            |                                                                     | 1.79 | 0.05 |
| DUOX2                  | dual oxidase 2                                                      | 1.79 | 0.03 |
| NRSN1                  | neurensin 1                                                         | 1.78 | 0.00 |
| RAB7B                  | RAB7B, member RAS oncogene<br>family                                | 1.78 | 0.00 |
| IL10RA                 | interleukin 10 receptor subunit alpha                               | 1.77 | 0.00 |
| MALRD1                 | MAM and LDL receptor class A<br>domain containing 1                 | 1.75 | 0.01 |
| GADL1                  | glutamate decarboxylase like 1                                      | 1.74 | 0.00 |

|                        |                                                        |      |      |
|------------------------|--------------------------------------------------------|------|------|
| gene:ENSSSCG0000003476 |                                                        | 1.73 | 0.02 |
| 1                      |                                                        |      |      |
| GRIK4                  | glutamate ionotropic receptor kainate type subunit 4   | 1.70 | 0.01 |
| MYMK                   | myomaker, myoblast fusion factor                       | 1.69 | 0.00 |
| RAB6B                  | RAB6B, member RAS oncogene family                      | 1.68 | 0.01 |
| gene:ENSSSCG0000003481 |                                                        | 1.66 | 0.01 |
| 2                      |                                                        |      |      |
| P2RX1                  | purinergic receptor P2X 1                              | 1.64 | 0.02 |
| ADRA1D                 | adrenoceptor alpha 1D                                  | 1.64 | 0.03 |
| BEX4                   | brain expressed X-linked 4                             | 1.63 | 0.02 |
| SAYSD1                 | SAYSVFN motif domain containing 1                      | 1.63 | 0.00 |
| CCDC173                | coiled-coil domain containing 173                      | 1.60 | 0.00 |
| gene:ENSSSCG0000000983 |                                                        | 1.58 | 0.03 |
| 9                      |                                                        |      |      |
| SLC39A12               | solute carrier family 39 member 12                     | 1.58 | 0.04 |
| CROCC2                 | ciliary rootlet coiled-coil, rootletin family member 2 | 1.58 | 0.01 |
| SPATA18                | spermatogenesis associated 18                          | 1.56 | 0.05 |
| NR4A1                  | nuclear receptor subfamily 4 group A member 1          | 1.54 | 0.00 |
| RF02159                |                                                        | 1.52 | 0.01 |
| MAATS1                 | MYCBP associated and testis expressed 1                | 1.51 | 0.04 |
| gene:ENSSSCG0000000950 |                                                        | 1.50 | 0.01 |
| 0                      |                                                        |      |      |
| FOS                    | Fos proto-oncogene, AP-1 transcription factor subunit  | 1.50 | 0.03 |
| ACSM3                  | acyl-CoA synthetase medium chain family member 3       | 1.49 | 0.02 |
| gene:ENSSSCG0000003970 |                                                        | 1.48 | 0.01 |
| 4                      |                                                        |      |      |
| CDH16                  | cadherin 16                                            | 1.47 | 0.03 |
| VANGL2                 | VANGL planar cell polarity protein 2                   | 1.47 | 0.02 |
| gene:ENSSSCG0000001801 |                                                        | 1.46 | 0.03 |
| 5                      |                                                        |      |      |
| gene:ENSSSCG0000000895 |                                                        | 1.45 | 0.01 |

---

|          |                                                                          |      |      |
|----------|--------------------------------------------------------------------------|------|------|
| 4        |                                                                          |      |      |
| KLRG2    | killer cell lectin like receptor G2                                      | 1.45 | 0.03 |
| LRRC4B   | leucine rich repeat containing 4B                                        | 1.45 | 0.00 |
| SYT17    | synaptotagmin 17                                                         | 1.44 | 0.01 |
| PHACTR3  | phosphatase and actin regulator 3                                        | 1.42 | 0.00 |
| CTGF     | connective tissue growth factor                                          | 1.42 | 0.00 |
| SYT13    | synaptotagmin 13                                                         | 1.42 | 0.03 |
| L3HYPDH  | trans-L-3-hydroxyproline dehydratase                                     | 1.41 | 0.00 |
| EXD1     | exonuclease 3'-5' domain containing 1                                    | 1.41 | 0.01 |
| FGF16    | fibroblast growth factor 16                                              | 1.40 | 0.03 |
| TACR1    | tachykinin receptor 1                                                    | 1.39 | 0.02 |
| FGFRL1   | fibroblast growth factor receptor like 1                                 | 1.38 | 0.00 |
| COL13A1  | collagen type XIII alpha 1 chain                                         | 1.38 | 0.02 |
| GDF11    | growth differentiation factor 11                                         | 1.37 | 0.02 |
| FRAS1    | Fraser extracellular matrix complex<br>subunit 1                         | 1.37 | 0.00 |
| MID1     | midline 1                                                                | 1.37 | 0.02 |
| ARNT2    | aryl hydrocarbon receptor nuclear<br>translocator 2                      | 1.37 | 0.01 |
| EYA1     | EYA transcriptional coactivator and<br>phosphatase 1                     | 1.36 | 0.02 |
| MYOZ1    | myozenin 1                                                               | 1.36 | 0.04 |
| FMO5     | flavin containing monooxygenase 5                                        | 1.36 | 0.02 |
| ITGAE    | integrin subunit alpha E                                                 | 1.36 | 0.00 |
| SHAS2    |                                                                          | 1.35 | 0.01 |
| TANC2    | tetratricopeptide repeat, ankyrin repeat<br>and coiled-coil containing 2 | 1.35 | 0.01 |
| PHLDA1   | pleckstrin homology like domain<br>family A member 1                     | 1.33 | 0.01 |
| EGR2     | early growth response 2                                                  | 1.33 | 0.00 |
| PLEK2    | pleckstrin 2                                                             | 1.32 | 0.02 |
| EDIL3    | EGF like repeats and discoidin<br>domains 3                              | 1.32 | 0.00 |
| IL6      | interleukin 6                                                            | 1.32 | 0.03 |
| RAB17    | RAB17, member RAS oncogene<br>family                                     | 1.30 | 0.03 |
| FRMD1    | FERM domain containing 1                                                 | 1.30 | 0.02 |
| ADAMTS14 | ADAM metalloproteinase with                                              | 1.30 | 0.01 |

---

|                        |                                                                  |      |      |
|------------------------|------------------------------------------------------------------|------|------|
|                        | thrombospondin type 1 motif 14                                   |      |      |
| GPNMB                  | glycoprotein nmb                                                 | 1.28 | 0.01 |
| GPC4                   | glypican 4                                                       | 1.28 | 0.00 |
| MILR1                  | mast cell immunoglobulin like receptor 1                         | 1.28 | 0.05 |
| TNFAIP6                | TNF alpha induced protein 6                                      | 1.28 | 0.01 |
| ARG1                   | arginase 1                                                       | 1.28 | 0.05 |
| FGD6                   | FYVE, RhoGEF and PH domain containing 6                          | 1.27 | 0.00 |
| PTN                    | pleiotrophin                                                     | 1.27 | 0.04 |
| gene:ENSSSCG0000003259 |                                                                  | 1.27 | 0.00 |
| 4                      |                                                                  |      |      |
| SIGLEC1                | sialic acid binding Ig like lectin 1                             | 1.26 | 0.04 |
| PIWIL4                 | piwi like RNA-mediated gene silencing 4                          | 1.26 | 0.03 |
| CSRNP1                 | cysteine and serine rich nuclear protein 1                       | 1.25 | 0.00 |
| SLC6A4                 | solute carrier family 6 member 4                                 | 1.23 | 0.01 |
| EFCC1                  | EF-hand and coiled-coil domain containing 1                      | 1.23 | 0.02 |
| LOXL4                  | lysyl oxidase like 4                                             | 1.22 | 0.02 |
| PCSK4                  | proprotein convertase subtilisin/kexin type 4                    | 1.22 | 0.02 |
| ATP4A                  | ATPase H <sup>+</sup> /K <sup>+</sup> transporting alpha subunit | 1.22 | 0.05 |
| MBOAT2                 | membrane bound O-acyltransferase domain containing 2             | 1.21 | 0.00 |
| CHST1                  | carbohydrate sulfotransferase 1                                  | 1.19 | 0.01 |
| NR4A3                  | nuclear receptor subfamily 4 group A member 3                    | 1.17 | 0.00 |
| gene:ENSSSCG0000003426 |                                                                  | 1.17 | 0.01 |
| 6                      |                                                                  |      |      |
| XKRX                   | XK related, X-linked                                             | 1.17 | 0.04 |
| IER5                   | immediate early response 5                                       | 1.17 | 0.00 |
| gene:ENSSSCG0000004069 |                                                                  | 1.17 | 0.02 |
| 3                      |                                                                  |      |      |
| INHA                   | inhibin alpha subunit                                            | 1.16 | 0.00 |
| NEU3                   | neuraminidase 3                                                  | 1.16 | 0.00 |

|                         |                                                     |      |      |
|-------------------------|-----------------------------------------------------|------|------|
| EHD3                    | EH domain containing 3                              | 1.15 | 0.00 |
| UCHL1                   | ubiquitin C-terminal hydrolase L1                   | 1.15 | 0.01 |
| TMCO4                   | transmembrane and coiled-coil domains 4             | 1.14 | 0.05 |
| HMGCLL1                 | 3-hydroxymethyl-3-methylglutaryl-Co A lyase like 1  | 1.14 | 0.04 |
| CDKL3                   | cyclin dependent kinase like 3                      | 1.14 | 0.02 |
| PSD                     | pleckstrin and Sec7 domain containing               | 1.13 | 0.05 |
| C2orf76                 | chromosome 2 open reading frame 76                  | 1.12 | 0.03 |
| gene:ENSSSCG00000010278 |                                                     | 1.12 | 0.00 |
| gene:ENSSSCG00000032301 |                                                     | 1.12 | 0.04 |
| TCTN3                   | tectonic family member 3                            | 1.10 | 0.02 |
| PHEX                    | phosphate regulating endopeptidase homolog X-linked | 1.07 | 0.01 |
| EPB41L5                 | erythrocyte membrane protein band 4.1 like 5        | 1.07 | 0.00 |
| FBP1                    | fructose-bisphosphatase 1                           | 1.06 | 0.02 |
| NAAA                    | N-acylethanolamine acid amidase                     | 1.06 | 0.00 |
| VWA5A                   | von Willebrand factor A domain containing 5A        | 1.06 | 0.00 |
| IRX5                    | iroquois homeobox 5                                 | 1.06 | 0.03 |
| ZSWIM4                  | zinc finger SWIM-type containing 4                  | 1.05 | 0.01 |
| LGALS3                  | galectin 3                                          | 1.05 | 0.01 |
| TP63                    | tumor protein p63                                   | 1.05 | 0.01 |
| CYFIP2                  | cytoplasmic FMR1 interacting protein 2              | 1.05 | 0.00 |
| CDKL1                   | cyclin dependent kinase like 1                      | 1.05 | 0.00 |
| ETV1                    | ETS variant 1                                       | 1.04 | 0.00 |
| PLAUR                   | plasminogen activator, urokinase receptor           | 1.04 | 0.02 |
| FRZB                    | frizzled related protein                            | 1.03 | 0.03 |
| PLIN5                   | perilipin 5                                         | 1.03 | 0.02 |
| MASP1                   | mannan binding lectin serine peptidase 1            | 1.02 | 0.00 |
| BCAT1                   | branched chain amino acid transaminase 1            | 1.01 | 0.01 |



|                             |                                                         |      |      |
|-----------------------------|---------------------------------------------------------|------|------|
| ATP13A3                     | ATPase 13A3                                             | 1.01 | 0.00 |
| HABP2                       | hyaluronan binding protein 2                            | 1.00 | 0.05 |
| FBLN5                       | fibulin 5                                               | 0.99 | 0.02 |
| GNB3                        | G protein subunit beta 3                                | 0.99 | 0.00 |
| RIPOR2                      | RHO family interacting cell<br>polarization regulator 2 | 0.99 | 0.00 |
| ADGRF2                      | adhesion G protein-coupled receptor<br>F2               | 0.98 | 0.05 |
| C12orf75                    | chromosome 12 open reading frame 75                     | 0.98 | 0.01 |
| CHMP4C                      | charged multivesicular body protein<br>4C               | 0.97 | 0.01 |
| FMO2                        | flavin containing monooxygenase 2                       | 0.96 | 0.03 |
| SERPINF1                    | serpin family F member 1                                | 0.96 | 0.00 |
| FAM46B                      | family with sequence similarity 46<br>member B          | 0.95 | 0.02 |
| gene:ENSSSCG0000001529<br>3 |                                                         | 0.95 | 0.04 |
| BTG2                        | BTG anti-proliferation factor 2                         | 0.95 | 0.05 |
| TGIF1                       | TGFB induced factor homeobox 1                          | 0.94 | 0.01 |
| DNER                        | delta/notch like EGF repeat containing                  | 0.94 | 0.05 |
| IGFBP3                      | insulin like growth factor binding<br>protein 3         | 0.93 | 0.03 |
| DUSP2                       | dual specificity phosphatase 2                          | 0.93 | 0.03 |
| ITGA11                      | integrin subunit alpha 11                               | 0.92 | 0.01 |
| MAFF                        | MAF bZIP transcription factor F                         | 0.92 | 0.01 |
| KRT80                       | keratin 80                                              | 0.91 | 0.02 |
| gene:ENSSSCG0000000438<br>8 |                                                         | 0.91 | 0.03 |
| EPGN                        | epithelial mitogen                                      | 0.91 | 0.05 |
| C4BPA                       | complement component 4 binding<br>protein alpha         | 0.90 | 0.00 |
| RF02160                     |                                                         | 0.90 | 0.04 |
| NR4A2                       | nuclear receptor subfamily 4 group A<br>member 2        | 0.90 | 0.01 |
| BCL6                        | B cell CLL/lymphoma 6                                   | 0.90 | 0.00 |
| FEM1C                       | fem-1 homolog C                                         | 0.89 | 0.00 |
| gene:ENSSSCG0000003145<br>0 |                                                         | 0.89 | 0.00 |

|                        |                                                                           |      |      |
|------------------------|---------------------------------------------------------------------------|------|------|
| KIAA1324L              | KIAA1324 like                                                             | 0.88 | 0.00 |
| PHACTR1                | phosphatase and actin regulator 1                                         | 0.88 | 0.02 |
| RGS1                   | regulator of G protein signaling 1                                        | 0.88 | 0.02 |
| PLXDC1                 | plexin domain containing 1                                                | 0.87 | 0.01 |
| AOX1                   | aldehyde oxidase 1                                                        | 0.87 | 0.03 |
| CDON                   | cell adhesion associated, oncogene regulated                              | 0.87 | 0.00 |
| IER3                   | immediate early response 3                                                | 0.87 | 0.03 |
| ADCY5                  | adenylate cyclase 5                                                       | 0.87 | 0.00 |
| gene:ENSSSCG0000000345 |                                                                           | 0.87 | 0.03 |
| 1                      |                                                                           |      |      |
| SGSM1                  | small G protein signaling modulator 1                                     | 0.86 | 0.04 |
| STX11                  | syntaxin 11                                                               | 0.86 | 0.05 |
| CX3CL1                 | C-X3-C motif chemokine ligand 1                                           | 0.86 | 0.02 |
| CARD11                 | caspase recruitment domain family member 11                               | 0.86 | 0.02 |
| KLF6                   | Kruppel like factor 6                                                     | 0.86 | 0.03 |
| MEST                   | mesoderm specific transcript                                              | 0.86 | 0.05 |
| CTSC                   | cathepsin C                                                               | 0.86 | 0.00 |
| SH3RF1                 | SH3 domain containing ring finger 1                                       | 0.86 | 0.05 |
| KLHL32                 | kelch like family member 32                                               | 0.85 | 0.01 |
| IGSF8                  | immunoglobulin superfamily member 8                                       | 0.85 | 0.02 |
| RNF180                 | ring finger protein 180                                                   | 0.85 | 0.00 |
| gene:ENSSSCG0000001104 |                                                                           | 0.85 | 0.02 |
| 1                      |                                                                           |      |      |
| SERPINE1               | serpin family E member 1                                                  | 0.84 | 0.01 |
| CCND2                  | cyclin D2                                                                 | 0.83 | 0.01 |
| GCNT2                  | glucosaminyl (N-acetyl) transferase 2, I-branching enzyme (I blood group) | 0.82 | 0.00 |
| SDR39U1                | short chain dehydrogenase/reductase family 39U member 1                   | 0.81 | 0.01 |
| KLF10                  | Kruppel like factor 10                                                    | 0.81 | 0.00 |
| WSCD2                  | WSC domain containing 2                                                   | 0.81 | 0.02 |
| gene:ENSSSCG0000002361 |                                                                           | 0.80 | 0.00 |
| 1                      |                                                                           |      |      |
| ADRB2                  | adrenoceptor beta 2                                                       | 0.80 | 0.03 |
| PPP2R1B                | protein phosphatase 2 scaffold subunit                                    | 0.79 | 0.01 |

| Abeta                  |                                                         |      |      |
|------------------------|---------------------------------------------------------|------|------|
| SLC51B                 | solute carrier family 51 beta subunit                   | 0.79 | 0.05 |
| DEPP1                  | DEPP1, autophagy regulator                              | 0.79 | 0.00 |
| MGST1                  | microsomal glutathione S-transferase 1                  | 0.79 | 0.00 |
| OLFM1                  | olfactomedin 1                                          | 0.78 | 0.04 |
| CYB5A                  | cytochrome b5 type A                                    | 0.78 | 0.00 |
| TNIK                   | TRAF2 and NCK interacting kinase                        | 0.78 | 0.00 |
| KCNA5                  | potassium voltage-gated channel<br>subfamily A member 5 | 0.78 | 0.02 |
| HTRA3                  | HtrA serine peptidase 3                                 | 0.77 | 0.01 |
| RTN4RL1                | reticulon 4 receptor like 1                             | 0.77 | 0.00 |
| SFRP1                  | secreted frizzled related protein 1                     | 0.77 | 0.00 |
| gene:ENSSSCG0000000325 |                                                         | 0.77 | 0.00 |
| 3                      |                                                         |      |      |
| CCDC18                 | coiled-coil domain containing 18                        | 0.76 | 0.04 |
| VSIG4                  | V-set and immunoglobulin domain<br>containing 4         | 0.76 | 0.01 |
| WFS1                   | wolframin ER transmembrane<br>glycoprotein              | 0.75 | 0.00 |
| HIST1H2BD              | histone cluster 1 H2B family member<br>d                | 0.75 | 0.00 |
| IFRD1                  | interferon related developmental<br>regulator 1         | 0.75 | 0.00 |
| FKBP10                 | FK506 binding protein 10                                | 0.74 | 0.03 |
| DCBLD2                 | discoidin, CUB and LCCL domain<br>containing 2          | 0.73 | 0.03 |
| RCAN1                  | regulator of calcineurin 1                              | 0.72 | 0.03 |
| CASQ1                  | calsequestrin 1                                         | 0.72 | 0.02 |
| CREM                   | cAMP responsive element modulator                       | 0.72 | 0.02 |
| gene:ENSSSCG0000000844 |                                                         | 0.71 | 0.01 |
| 0                      |                                                         |      |      |
| HEBP1                  | heme binding protein 1                                  | 0.71 | 0.01 |
| NABP1                  | nucleic acid binding protein 1                          | 0.71 | 0.02 |
| CCDC136                | coiled-coil domain containing 136                       | 0.71 | 0.04 |
| LAP3                   | leucine aminopeptidase 3                                | 0.71 | 0.00 |
| COL4A5                 | collagen type IV alpha 5 chain                          | 0.70 | 0.00 |
| F3                     | coagulation factor III, tissue factor                   | 0.70 | 0.01 |
| KLF4                   | Kruppel like factor 4                                   | 0.69 | 0.00 |

|          |                                                              |      |      |
|----------|--------------------------------------------------------------|------|------|
| SERPINE2 | serpin family E member 2                                     | 0.69 | 0.00 |
| IRF2BP2  | interferon regulatory factor 2 binding<br>protein 2          | 0.69 | 0.00 |
| FGF13    | fibroblast growth factor 13                                  | 0.68 | 0.00 |
| NDST3    | N-deacetylase and N-sulfotransferase 3                       | 0.68 | 0.04 |
| ZFP36    | ZFP36 ring finger protein                                    | 0.67 | 0.03 |
| GRAMD1C  | GRAM domain containing 1C                                    | 0.67 | 0.04 |
| SAT1     | spermidine/spermine<br>N1-acetyltransferase 1                | 0.66 | 0.00 |
| ALDH5A1  | aldehyde dehydrogenase 5 family<br>member A1                 | 0.66 | 0.00 |
| ARHGAP23 | Rho GTPase activating protein 23                             | 0.66 | 0.02 |
| PDGFD    | platelet derived growth factor D                             | 0.66 | 0.01 |
| GPC3     | glypican 3                                                   | 0.65 | 0.02 |
| FABP3    | fatty acid binding protein 3                                 | 0.64 | 0.00 |
| GGACT    | gamma-glutamylamine<br>cyclotransferase                      | 0.63 | 0.03 |
| SLC29A1  | solute carrier family 29 member 1<br>(Augustine blood group) | 0.63 | 0.00 |
| FEZ2     | fasciculation and elongation protein<br>zeta 2               | 0.63 | 0.01 |
| FBLIM1   | filamin binding LIM protein 1                                | 0.62 | 0.04 |
| FOLR1    | folate receptor 1                                            | 0.62 | 0.01 |
| C1QA     | complement C1q A chain                                       | 0.62 | 0.04 |
| PLXNA4   | plexin A4                                                    | 0.62 | 0.03 |
| BHLHE40  | basic helix-loop-helix family member<br>e40                  | 0.62 | 0.03 |
| FOSL2    | FOS like 2, AP-1 transcription factor<br>subunit             | 0.61 | 0.01 |
| TPM2     | tropomyosin 2                                                | 0.61 | 0.00 |
| STXBP6   | syntaxin binding protein 6                                   | 0.61 | 0.03 |
| RTL5     | retrotransposon Gag like 5                                   | 0.61 | 0.01 |
| SLC38A2  | solute carrier family 38 member 2                            | 0.61 | 0.01 |
| TCF21    | transcription factor 21                                      | 0.60 | 0.02 |
| NDEL1    | nudE neurodevelopment protein 1 like<br>1                    | 0.60 | 0.01 |
| CASZ1    | castor zinc finger 1                                         | 0.60 | 0.03 |
| PRKDC    | protein kinase, DNA-activated,                               | 0.60 | 0.03 |

|        |                                                             |      |      |
|--------|-------------------------------------------------------------|------|------|
|        | catalytic polypeptide                                       |      |      |
| TPPP3  | tubulin polymerization promoting<br>protein family member 3 | 0.59 | 0.02 |
| IL6R   | interleukin 6 receptor                                      | 0.59 | 0.00 |
| KDELC1 | KDEL motif containing 1                                     | 0.59 | 0.04 |

**Supplemental Table S4.**

Selected signature Sus Scrofa gene expressions altered < 0.66-fold change (Log<sub>2</sub>FC (RVOT-VPC/sham control) < -0.58) in the left ventricular free wall tissues of RVOT VPC group vs. sham control group at 6-month follow-up

| Symbol                  | Description                                       | Log <sub>2</sub><br>FC | P<br>value |
|-------------------------|---------------------------------------------------|------------------------|------------|
| LIPM                    | lipase family member M                            | -7.97                  | 0.00       |
| RLBP1                   | retinaldehyde binding protein 1                   | -7.30                  | 0.00       |
| gene:ENSSSCG00000034022 |                                                   | -5.71                  | 0.03       |
| RIMS3                   | regulating synaptic membrane<br>exocytosis 3      | -5.60                  | 0.02       |
| gene:ENSSSCG00000020695 |                                                   | -5.21                  | 0.00       |
| MMP9                    | matrix metalloproteinase 9                        | -5.14                  | 0.04       |
| GALR3                   | galanin receptor 3                                | -5.00                  | 0.04       |
| CLSTN2                  | calsynenin 2                                      | -4.72                  | 0.05       |
| FADS6                   | fatty acid desaturase 6                           | -4.54                  | 0.00       |
| WIF1                    | WNT inhibitory factor 1                           | -4.46                  | 0.00       |
| CDHR1                   | cadherin related family member 1                  | -4.41                  | 0.00       |
| GPRL15                  |                                                   | -3.91                  | 0.01       |
| CRLF1                   | cytokine receptor like factor 1                   | -3.77                  | 0.00       |
| RF00004_25              |                                                   | -3.67                  | 0.01       |
| gene:ENSSSCG00000035996 |                                                   | -3.59                  | 0.00       |
| MMP8                    | matrix metalloproteinase 8                        | -3.56                  | 0.02       |
| gene:ENSSSCG00000032652 |                                                   | -3.54                  | 0.02       |
| LCAT                    | lecithin-cholesterol acyltransferase              | -3.49                  | 0.02       |
| gene:ENSSSCG00000034356 |                                                   | -3.44                  | 0.00       |
| gene:ENSSSCG00000034253 |                                                   | -3.41                  | 0.00       |
| gene:ENSSSCG00000016475 |                                                   | -3.40                  | 0.00       |
| HOXB7                   | homeobox B7                                       | -3.35                  | 0.01       |
| SYCE1                   | synaptonemal complex central<br>element protein 1 | -3.31                  | 0.04       |
| CACNA1S                 | calcium voltage-gated channel<br>subunit alpha1 S | -3.30                  | 0.00       |
| NMB                     | neuromedin B                                      | -3.28                  | 0.02       |
| ANGPTL7                 | angiopoietin like 7                               | -3.22                  | 0.00       |
| S100A8                  | S100 calcium binding protein A8                   | -3.18                  | 0.00       |
| gene:ENSSSCG00000026402 |                                                   | -3.16                  | 0.03       |
| IFN-ALPHA-16            |                                                   | -3.14                  | 0.03       |

|                          |                                                                           |       |      |
|--------------------------|---------------------------------------------------------------------------|-------|------|
| TMIGD1                   | transmembrane and immunoglobulin domain containing 1                      | -3.09 | 0.01 |
| gene:ENSSSCG00000029705  |                                                                           | -3.02 | 0.03 |
| gene:ENSSSCG00000016245  |                                                                           | -2.98 | 0.01 |
| LTF                      | lactotransferrin                                                          | -2.92 | 0.00 |
| S100A12                  | S100 calcium binding protein A12                                          | -2.78 | 0.00 |
| NAT8L                    | N-acetyltransferase 8 like                                                | -2.78 | 0.01 |
| MAP3K9                   | mitogen-activated protein kinase kinase kinase 9                          | -2.71 | 0.05 |
| PCLAF                    | PCNA clamp associated factor                                              | -2.71 | 0.02 |
| KRT18                    | keratin 18                                                                | -2.71 | 0.04 |
| ACTG2                    | actin, gamma 2, smooth muscle, enteric                                    | -2.59 | 0.00 |
| PLIN1                    | perilipin 1                                                               | -2.59 | 0.03 |
| TNC                      | tenascin C                                                                | -2.48 | 0.00 |
| GPR37                    | G protein-coupled receptor 37                                             | -2.48 | 0.02 |
| NALCN                    | sodium leak channel, non-selective                                        | -2.46 | 0.00 |
| gene:ENSSSCG00000001231  |                                                                           | -2.45 | 0.00 |
| gene:ENSSSCG000000032596 |                                                                           | -2.43 | 0.03 |
| S100A9                   | S100 calcium binding protein A9                                           | -2.41 | 0.00 |
| gene:ENSSSCG000000013788 |                                                                           | -2.34 | 0.00 |
| gene:ENSSSCG000000038068 |                                                                           | -2.34 | 0.00 |
| gene:ENSSSCG000000031292 |                                                                           | -2.34 | 0.03 |
| KCNMB1                   | potassium calcium-activated channel subfamily M regulatory beta subunit 1 | -2.31 | 0.00 |
| CA3                      | carbonic anhydrase 3                                                      | -2.29 | 0.01 |
| gene:ENSSSCG000000006382 |                                                                           | -2.28 | 0.00 |
| STAC2                    | SH3 and cysteine rich domain 2                                            | -2.27 | 0.01 |
| CYP3A39                  |                                                                           | -2.20 | 0.00 |
| PKP1                     | plakophilin 1                                                             | -2.11 | 0.04 |
| ANKRD22                  | ankyrin repeat domain 22                                                  | -2.11 | 0.01 |
| gene:ENSSSCG000000038557 |                                                                           | -2.11 | 0.00 |
| ARHGEF16                 | Rho guanine nucleotide exchange factor 16                                 | -2.10 | 0.04 |
| DMRTA1                   | DMRT like family A1                                                       | -2.09 | 0.04 |
| KRT14                    | keratin 14                                                                | -2.08 | 0.05 |
| SLC9A3                   | solute carrier family 9 member A3                                         | -2.08 | 0.03 |

|                         |                                                              |       |      |
|-------------------------|--------------------------------------------------------------|-------|------|
| HOXA5                   | homeobox A5                                                  | -2.05 | 0.01 |
| FASLG                   | Fas ligand                                                   | -2.04 | 0.02 |
| ITGBL1                  | integrin subunit beta like 1                                 | -2.02 | 0.00 |
| XCL1                    | X-C motif chemokine ligand 1                                 | -2.02 | 0.03 |
| MT3                     | metallothionein 3                                            | -2.01 | 0.00 |
| gene:ENSSSCG00000029414 |                                                              | -2.00 | 0.00 |
| CD3D                    | CD3d molecule                                                | -1.99 | 0.00 |
| GZMB                    | granzyme B                                                   | -1.96 | 0.00 |
| gene:ENSSSCG00000013434 |                                                              | -1.95 | 0.00 |
| gene:ENSSSCG00000023746 |                                                              | -1.95 | 0.05 |
| gene:ENSSSCG00000031902 |                                                              | -1.94 | 0.01 |
| EMB                     | embigin                                                      | -1.93 | 0.05 |
| IFN-ALPHA-8             |                                                              | -1.93 | 0.04 |
| TBC1D10C                | TBC1 domain family member 10C                                | -1.92 | 0.01 |
| CD6                     | CD6 molecule                                                 | -1.91 | 0.00 |
| gene:ENSSSCG00000031610 |                                                              | -1.91 | 0.01 |
| SYTL1                   | synaptotagmin like 1                                         | -1.84 | 0.04 |
| KCNJ5                   | potassium voltage-gated channel<br>subfamily J member 5      | -1.83 | 0.00 |
| SLC1A1                  | solute carrier family 1 member 1                             | -1.83 | 0.00 |
| PVRIG                   | PVR related immunoglobulin<br>domain containing              | -1.82 | 0.05 |
| MT1A                    | metallothionein 1A                                           | -1.81 | 0.01 |
| IL7R                    | interleukin 7 receptor                                       | -1.81 | 0.03 |
| TREML2                  | triggering receptor expressed on<br>myeloid cells like 2     | -1.81 | 0.04 |
| DDAH1                   | dimethylarginine<br>dimethylaminohydrolase 1                 | -1.79 | 0.00 |
| gene:ENSSSCG00000017018 |                                                              | -1.79 | 0.00 |
| DAPP1                   | dual adaptor of phosphotyrosine and<br>3-phosphoinositides 1 | -1.79 | 0.03 |
| CST7                    | cystatin F                                                   | -1.78 | 0.02 |
| gene:ENSSSCG00000037676 |                                                              | -1.78 | 0.00 |
| CD96                    | CD96 molecule                                                | -1.76 | 0.04 |
| SEMA3A                  | semaphorin 3A                                                | -1.74 | 0.05 |
| IFNLR1                  | interferon lambda receptor 1                                 | -1.73 | 0.03 |
| CDCA7L                  | cell division cycle associated 7 like                        | -1.72 | 0.00 |
| DNAJC6                  | DnaJ heat shock protein family                               | -1.67 | 0.00 |



|                         |                                                           |       |      |
|-------------------------|-----------------------------------------------------------|-------|------|
|                         | (Hsp40) member C6                                         |       |      |
| FOXC1                   | forkhead box C1                                           | -1.67 | 0.02 |
| SLC6A17                 | solute carrier family 6 member 17                         | -1.67 | 0.01 |
| CCL19                   | C-C motif chemokine ligand 19                             | -1.67 | 0.01 |
| MSTN                    | myostatin                                                 | -1.67 | 0.01 |
| gene:ENSSSCG00000040295 |                                                           | -1.65 | 0.03 |
| MMRN2                   | multimerin 2                                              | -1.62 | 0.00 |
| PRF1                    | perforin 1                                                | -1.61 | 0.01 |
| MYL1                    | myosin light chain 1                                      | -1.61 | 0.01 |
| KCNC4                   | potassium voltage-gated channel<br>subfamily C member 4   | -1.60 | 0.02 |
| CD5                     | CD5 molecule                                              | -1.59 | 0.01 |
| CD69                    | CD69 molecule                                             | -1.59 | 0.00 |
| ICOS                    | inducible T cell costimulator                             | -1.59 | 0.05 |
| CD52                    | CD52 molecule                                             | -1.58 | 0.00 |
| CYP2S1                  | cytochrome P450 family 2 subfamily<br>S member 1          | -1.56 | 0.03 |
| CX3CR1                  | C-X3-C motif chemokine receptor 1                         | -1.56 | 0.00 |
| gene:ENSSSCG00000033721 |                                                           | -1.55 | 0.01 |
| GALNT13                 | polypeptide<br>N-acetylgalactosaminyltransferase<br>13    | -1.55 | 0.03 |
| SFRP5                   | secreted frizzled related protein 5                       | -1.53 | 0.01 |
| KANK4                   | KN motif and ankyrin repeat<br>domains 4                  | -1.53 | 0.04 |
| SERTAD4                 | SERTA domain containing 4                                 | -1.53 | 0.01 |
| MYO1G                   | myosin IG                                                 | -1.51 | 0.01 |
| GYG2                    | glycogenin 2                                              | -1.50 | 0.03 |
| SNX22                   | sorting nexin 22                                          | -1.50 | 0.00 |
| gene:ENSSSCG00000039222 |                                                           | -1.50 | 0.04 |
| LPXN                    | leupaxin                                                  | -1.49 | 0.03 |
| gene:ENSSSCG00000037885 |                                                           | -1.49 | 0.01 |
| SIT1                    | signaling threshold regulating<br>transmembrane adaptor 1 | -1.47 | 0.03 |
| gene:ENSSSCG00000040410 |                                                           | -1.46 | 0.04 |
| gene:ENSSSCG00000020967 |                                                           | -1.45 | 0.02 |
| SCG3                    | secretogranin III                                         | -1.43 | 0.02 |
| CD2                     | CD2 molecule                                              | -1.41 | 0.00 |

|                         |                                                             |       |      |
|-------------------------|-------------------------------------------------------------|-------|------|
| SALL4                   | spalt like transcription factor 4                           | -1.40 | 0.03 |
| gene:ENSSSCG00000035256 |                                                             | -1.36 | 0.00 |
| gene:ENSSSCG00000002140 |                                                             | -1.34 | 0.00 |
| ANPEP                   | alanyl aminopeptidase, membrane                             | -1.32 | 0.05 |
| PYGO1                   | pygopus family PHD finger 1                                 | -1.31 | 0.02 |
| MYH11                   | myosin heavy chain 11                                       | -1.30 | 0.04 |
| gene:ENSSSCG00000028341 |                                                             | -1.29 | 0.02 |
| CCL5                    | C-C motif chemokine ligand 5                                | -1.29 | 0.01 |
| IKZF3                   | IKAROS family zinc finger 3                                 | -1.27 | 0.01 |
| gene:ENSSSCG00000040350 |                                                             | -1.26 | 0.02 |
| KIF21B                  | kinesin family member 21B                                   | -1.26 | 0.01 |
| RASAL3                  | RAS protein activator like 3                                | -1.26 | 0.04 |
| GNLY                    | granulysin                                                  | -1.26 | 0.00 |
| CD3E                    | CD3e molecule                                               | -1.25 | 0.03 |
| TMEM102                 | transmembrane protein 102                                   | -1.25 | 0.04 |
| TRIM25                  | tripartite motif containing 25                              | -1.22 | 0.01 |
| APOE                    | apolipoprotein E                                            | -1.21 | 0.02 |
| DKK1                    | dickkopf WNT signaling pathway inhibitor 1                  | -1.19 | 0.03 |
| SKAP1                   | src kinase associated phosphoprotein 1                      | -1.19 | 0.03 |
| FAM43B                  | family with sequence similarity 43 member B                 | -1.18 | 0.05 |
| ASS1                    | argininosuccinate synthase 1                                | -1.17 | 0.00 |
| GIMAP8                  | GTPase, IMAP family member 8                                | -1.17 | 0.02 |
| ROBO3                   | roundabout guidance receptor 3                              | -1.16 | 0.04 |
| CPXM1                   | carboxypeptidase X, M14 family member 1                     | -1.15 | 0.01 |
| CDH24                   | cadherin 24                                                 | -1.14 | 0.01 |
| KIF18B                  | kinesin family member 18B                                   | -1.14 | 0.04 |
| MMP28                   | matrix metalloproteinase 28                                 | -1.14 | 0.02 |
| IFIT2                   | interferon induced protein with tetratricopeptide repeats 2 | -1.14 | 0.00 |
| gene:ENSSSCG00000017019 |                                                             | -1.13 | 0.04 |
| SRARP                   | steroid receptor associated and regulated protein           | -1.13 | 0.02 |
| GCAT                    | glycine C-acetyltransferase                                 | -1.12 | 0.01 |
| gene:ENSSSCG00000008898 |                                                             | -1.12 | 0.00 |

|                         |                                                             |       |      |
|-------------------------|-------------------------------------------------------------|-------|------|
| UBASH3B                 | ubiquitin associated and SH3 domain containing B            | -1.11 | 0.00 |
| SEMA4A                  | semaphorin 4A                                               | -1.11 | 0.03 |
| CD8A                    | CD8a molecule                                               | -1.10 | 0.02 |
| INMT                    | indolethylamine N-methyltransferase                         | -1.09 | 0.02 |
| SLA2                    | Src like adaptor 2                                          | -1.09 | 0.02 |
| gene:ENSSSCG00000029596 |                                                             | -1.08 | 0.02 |
| INPP1                   | inositol polyphosphate-1-phosphatase                        | -1.06 | 0.00 |
| SMPD3                   | sphingomyelin phosphodiesterase 3                           | -1.05 | 0.05 |
| POC5                    | POC5 centriolar protein                                     | -1.05 | 0.00 |
| gene:ENSSSCG00000012531 |                                                             | -1.05 | 0.03 |
| AEBP1                   | AE binding protein 1                                        | -1.04 | 0.03 |
| ACKR1                   | atypical chemokine receptor 1 (Duffy blood group)           | -1.04 | 0.02 |
| SESN2                   | sestrin 2                                                   | -1.03 | 0.02 |
| PTGER2                  | prostaglandin E receptor 2                                  | -1.01 | 0.00 |
| gene:ENSSSCG00000014909 |                                                             | -1.01 | 0.05 |
| IFIT1                   | interferon induced protein with tetratricopeptide repeats 1 | -0.96 | 0.00 |
| PLVAP                   | plasmalemma vesicle associated protein                      | -0.95 | 0.00 |
| gene:ENSSSCG00000036785 |                                                             | -0.94 | 0.01 |
| ITGA4                   | integrin subunit alpha 4                                    | -0.94 | 0.03 |
| gene:ENSSSCG00000036675 |                                                             | -0.93 | 0.05 |
| CMPK2                   | cytidine/uridine monophosphate kinase 2                     | -0.93 | 0.03 |
| DNAH8                   | dynein axonemal heavy chain 8                               | -0.92 | 0.04 |
| SHD                     | Src homology 2 domain containing transforming protein D     | -0.91 | 0.04 |
| GXYLT1                  | glucoside xylosyltransferase 1                              | -0.89 | 0.01 |
| gene:ENSSSCG00000037377 |                                                             | -0.89 | 0.04 |
| THAP1                   | THAP domain containing 1                                    | -0.89 | 0.00 |
| TMEM88                  | transmembrane protein 88                                    | -0.85 | 0.00 |
| MMRN1                   | multimerin 1                                                | -0.85 | 0.02 |
| FBF1                    | Fas binding factor 1                                        | -0.84 | 0.05 |
| STK17B                  | serine/threonine kinase 17b                                 | -0.84 | 0.02 |

|                         |                                                         |       |      |
|-------------------------|---------------------------------------------------------|-------|------|
| FHL5                    | four and a half LIM domains 5                           | -0.84 | 0.00 |
| ZSCAN4                  | zinc finger and SCAN domain<br>containing 4             | -0.83 | 0.01 |
| RAC2                    | Rac family small GTPase 2                               | -0.81 | 0.05 |
| RAB27A                  | RAB27A, member RAS oncogene<br>family                   | -0.81 | 0.03 |
| TTC38                   | tetratricopeptide repeat domain 38                      | -0.80 | 0.05 |
| TBC1D8B                 | TBC1 domain family member 8B                            | -0.80 | 0.02 |
| FABP4                   | fatty acid binding protein 4                            | -0.79 | 0.00 |
| NLRC5                   | NLR family CARD domain<br>containing 5                  | -0.79 | 0.02 |
| gene:ENSSSCG00000022195 |                                                         | -0.79 | 0.04 |
| gene:ENSSSCG00000017608 |                                                         | -0.75 | 0.04 |
| SLC39A8                 | solute carrier family 39 member 8                       | -0.75 | 0.02 |
| RNF128                  | ring finger protein 128, E3 ubiquitin<br>protein ligase | -0.75 | 0.00 |
| DHRS7C                  | dehydrogenase/reductase 7C                              | -0.74 | 0.03 |
| gene:ENSSSCG00000001396 |                                                         | -0.74 | 0.02 |
| SERHL2                  | serine hydrolase like 2                                 | -0.73 | 0.00 |
| TPMT                    | thiopurine S-methyltransferase                          | -0.73 | 0.03 |
| CTSW                    | cathepsin W                                             | -0.72 | 0.02 |
| PTPRC                   | protein tyrosine phosphatase,<br>receptor type C        | -0.72 | 0.01 |
| MDK                     | midkine                                                 | -0.72 | 0.01 |
| FAM105A                 | family with sequence similarity 105<br>member A         | -0.70 | 0.04 |
| L1CAM                   | L1 cell adhesion molecule                               | -0.68 | 0.05 |
| RAPGEF3                 | Rap guanine nucleotide exchange<br>factor 3             | -0.68 | 0.01 |
| CORO1A                  | coronin 1A                                              | -0.68 | 0.05 |
| BEND6                   | BEN domain containing 6                                 | -0.67 | 0.04 |
| MAP1B                   | microtubule associated protein 1B                       | -0.66 | 0.00 |
| RNF19B                  | ring finger protein 19B                                 | -0.66 | 0.00 |
| CYTIP                   | cytohesin 1 interacting protein                         | -0.65 | 0.02 |
| ZNF649                  | zinc finger protein 649                                 | -0.65 | 0.05 |
| ZNF436                  | zinc finger protein 436                                 | -0.64 | 0.01 |
| ALKBH1                  | alkB homolog 1, histone H2A<br>dioxygenase              | -0.64 | 0.04 |

|                         |                                      |       |      |
|-------------------------|--------------------------------------|-------|------|
| PFKP                    | phosphofructokinase, platelet        | -0.63 | 0.00 |
| GTSE1                   | G2 and S-phase expressed 1           | -0.62 | 0.02 |
| MX2                     | MX dynamin like GTPase 2             | -0.62 | 0.02 |
| F8                      | coagulation factor VIII              | -0.62 | 0.03 |
| CA4                     | carbonic anhydrase 4                 | -0.62 | 0.00 |
| ZCCHC2                  | zinc finger CCHC-type containing 2   | -0.61 | 0.02 |
| KLHL41                  | kelch like family member 41          | -0.61 | 0.01 |
| UBXN7                   | UBX domain protein 7                 | -0.59 | 0.03 |
| gene:ENSSSCG00000035293 |                                      | -0.59 | 0.01 |
| TRAPPC4                 | trafficking protein particle complex | -0.59 | 0.04 |
|                         | 4                                    |       |      |

### Supplemental Table S5.

Top Involved Canonical Pathways and Diseases and Functions of Differentially Expressed Genes (DEGs) Between RVOT-VPC and Sham Control Groups

| Location          | Top Canonical Pathways and Diseases and Functions | Involved DEGs                                                               | P value     |
|-------------------|---------------------------------------------------|-----------------------------------------------------------------------------|-------------|
| <b>Septum*</b>    | Actin Cytoskeleton Signaling                      | FGF16,RAC2,PAK1,CYFIP2,FN1,PAK3,DIAPH3,PIK3R6,FGFR2,MYLK,ACTG2,ITGA4,IQGAP3 | 0.006309573 |
|                   | Signaling by Rho Family GTPases                   | MAP3K12,PAK1,CDH12,GNB3,PAK3,DIAPH3,CDH24,PIK3R6,FGFR2,MYLK,ACTG2,ITGA4     | 0.036307805 |
|                   | RhoGDI Signaling                                  | PAK1,CDH12,GNB3,PAK3,CREBBP,CDH24,ARHGAP4,ACTG2,ITGA4,EP300                 | 0.019054607 |
|                   | ILK Signaling                                     | ITGB2,FBLIM1,FN1,CREBBP,PIK3R6,FGFR2,KRT18,ACTG2,MMP9,EP300                 | 0.033113112 |
|                   | LXR/RXR Activation                                | LYZ,SERPINF1,ARG2,S100A8,MMP9,TNFRSF11B,AGT                                 | 0.042657952 |
|                   | Cardiac Hypertrophy Signaling                     | ADRA2B,MAP3K12,CACNA1S,PLCB2,GNB3,IGF1,CREBBP,PIK3R6,FGFR2,EP300,ADRB2      | 0.045708819 |
| <b>Free wall†</b> | Actin Cytoskeleton Signaling                      | RAC2,FGF16,CYFIP2,MYL4,ACTG2,MYH11,PDGFD,MYL1,ITGA4,FGF13                   | 0.033113112 |
|                   | Signaling by Rho Family GTPases                   | MAP3K9,FOS,CDH12,GNB3,ARHGEF16,CDH24,MYL4,ACTG2,CDH16,MYL1,ITGA4            | 0.031622777 |
|                   | RhoGDI Signaling                                  | CDH12,GNB3,ARHGEF16,CDH24,MYL4,ACTG2,CDH16,MYL1,ITGA4                       | 0.020892961 |
|                   | ILK Signaling                                     | FOS,FBLIM1,MYL4,KRT18,ACTG2,MYH11,PTGS2,PPP2R1B,MMP9,MYL1                   | 0.014454398 |
|                   | LXR/RXR Activation                                | APOE,LCAT,IL1RL2,CCL2,SERPINF1,ARG2,S100A8,IL6,PTGS2,MMP9                   | 0.000501187 |
|                   | Cardiac Hypertrophy Signaling                     | MAP3K9,CACNA1S,GNB3,ADCY5,IL6R,MYL4,IL6,MYL1,ADRA1D,ADRB2                   | 0.043651583 |

\*: The canonical pathways/diseases/functions derived from 634 differentially expressed genes of left ventricular septum.

†: The canonical pathways/diseases/functions derived from 557 differentially expressed genes of left ventricular free wall.

## Supplemental Figure S1.

**Hemodynamics obtained before creating RVOT bigeminy VPC in the pig models and before sacrifice at 6-month follow-up.** There were no significant differences in pressures (P) in the ascending aorta (AO), left ventricle (LV), pulmonary artery (PA), right ventricle (RV) and right atrium (RA) between RVOT-VPC group and sham control group.

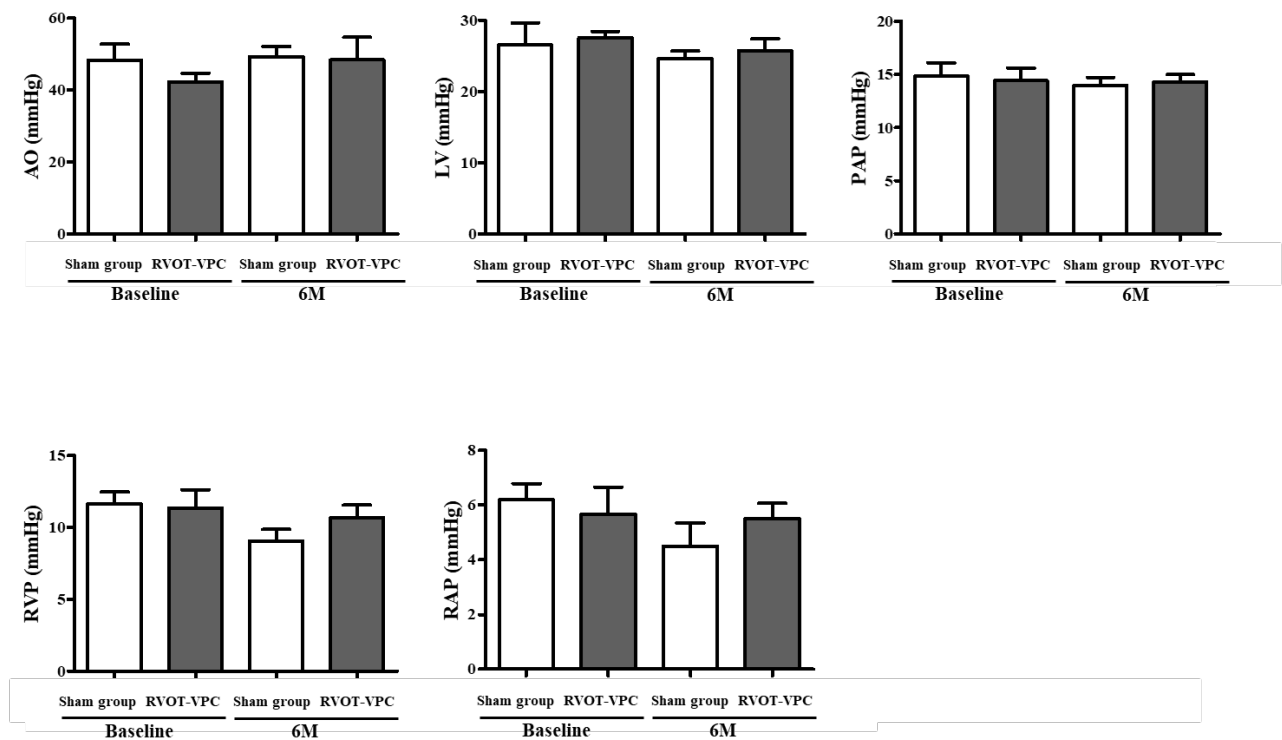

## Supplemental Figure S2.

**(A) Unsupervised hierarchical clustering of RNA next generation sequencing expression values in the left ventricular septum between RVOT-VPC group and sham control group.**

A total of 634 genes were identified, of which 269 of these genes were differentially upregulated and 365 were differentially downregulated. **(B) Unsupervised hierarchical**

**clustering of RNA next generation sequencing expression values in the left ventricular free wall between RVOT-VPC group and sham control group.** A total of 557 genes were

identified, of which 330 genes were differentially upregulated and 227 genes were differentially downregulated. Bar color indicates mRNA expression level. Red indicates

up-regulation; white, no change; blue, down-regulation. Activation z-score analysis method

was used to measure activation states of the top involved canonical pathways affected by

differentially expressed genes between RVOT-VPC group and sham control group and six

pathways were altered at both septum **(C)** and free wall **(D)** of left ventricle. Blue bar

indicates negative z-score (inhibition of pathway) while red bar indicates positive z-score

(activation of pathway). Activation z-score analysis showed only actin cytoskeleton signaling,

RhoGDI signaling, signaling by Rho Family GTPases and ILK Signaling presented z-scores

with same activation states in both the left ventricular septum and left ventricular free wall.

The ratio of polyline represented the number of differentially expressed genes involved in a pathway divided by the total number of genes in a pathway.



**A**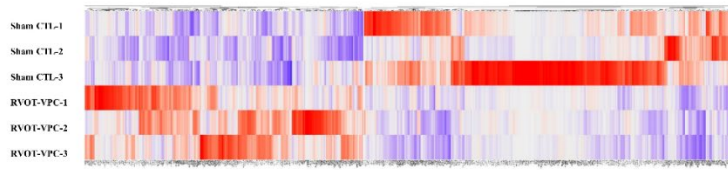**B**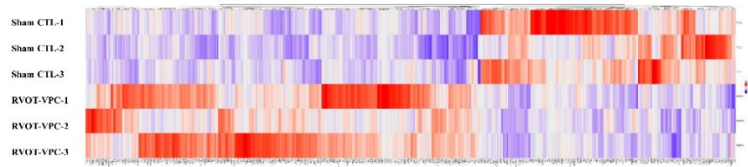**C**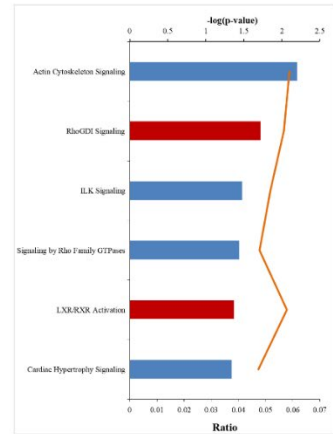**D**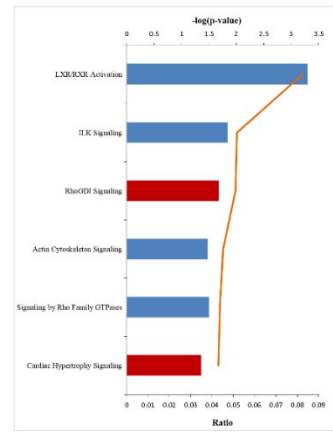

### **Supplemental Figure S3.**

**Flowchart of the creation of a right ventricular outflow tract (RVOT) bigeminy ventricular premature contraction (VPC) pig model, echocardiographic examination, next generation sequencing (NGS) analysis, functional enrichment analysis and genes, proteins and histochemical studies.** Echocardiograms were performed twice, first within 1 week before creating RVOT PVC model and then within 1 week before all pigs were sacrificed at the 6-month follow-up in the RVOT VPC and sham control groups. In both groups, ventricular sensing (A port) lead was placed at the RV free wall and ventricular pacing (V port) lead was placed at the RVOT septum. Myocardial tissues of the septum and free wall of the left ventricle (LV) at the level of the papillary muscle were dissected and collected after sacrifice at the 6-month follow-up in both groups and some tissues were stored in optimum cutting temperature compound (OCT) for immunofluorescence studies. The midmyocardial layer of the myocardial tissues was sent for immunofluorescence, NGS and Western blotting/PCR studies. RA: right atrium; PA: pulmonary artery; Ao: ascending aorta.

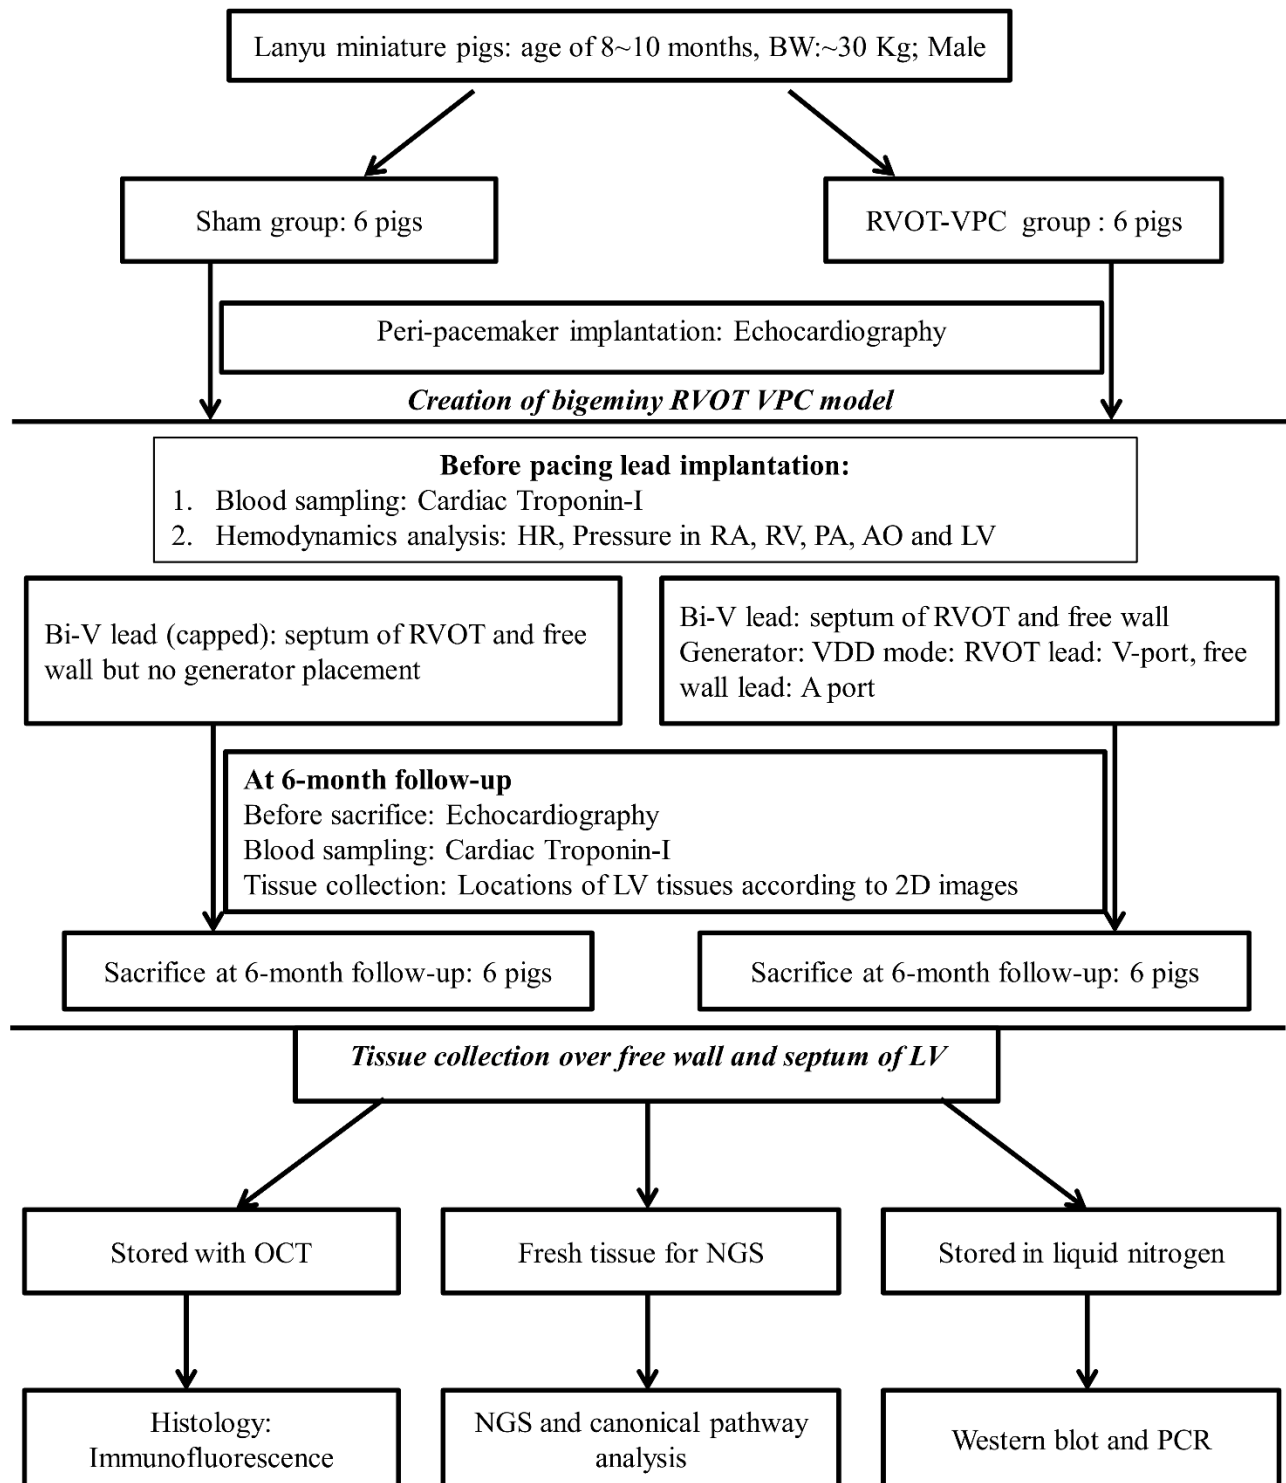

### Supplemental Figure S4.

**Locations of sensing/pacing leads on fluoroscopy and at autopsy.** The active bipolar lead was inserted into right ventricle and fixed over the free wall of right ventricle, which served as the sense lead and was connected to the A port of pacemaker. Another active bipolar lead was inserted into right ventricle and fixed over the septum of right ventricular outflow tract (RVOT), which served as the pacing lead and was connected to the V port of pacemaker. The locations of leads were presented in a cartoon image (A), in gross anatomy (B) and on fluoroscopic image in anterior-posterior view (C). The created RVOT bigeminy VPCs showed positive QRS complexes in leads II, III and aVF (red arrows) (D).

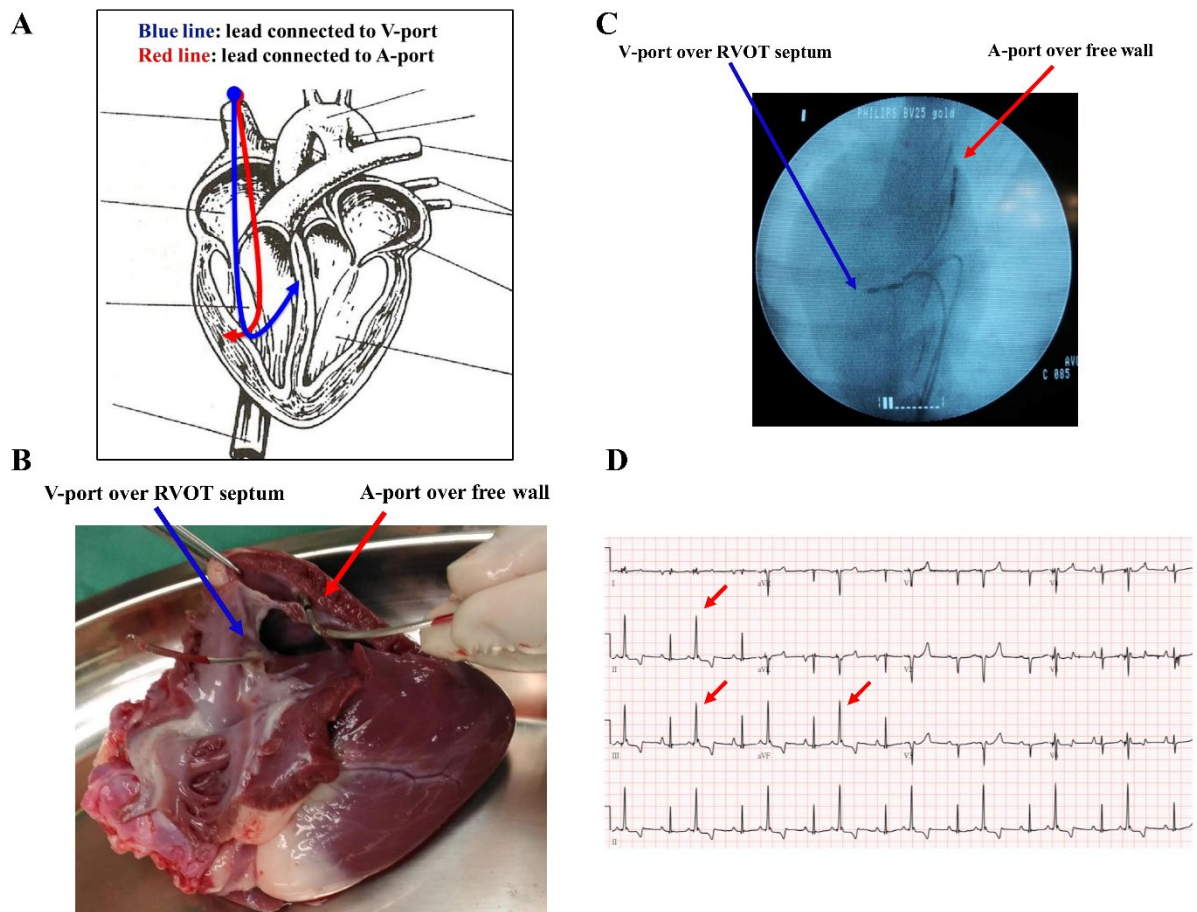

**Histogram and percentage of ventricular pacing recorded in generator in 6-month follow-up period.** After the sense lead and pacing lead were fixed to right ventricle, the function of pacing/sensing was ensured to work in bigeminy VPC model **(A)**. In the 6-month follow up period, the generator was interrogated at 1 week **(B)**; 1 month **(C)**; 3 months **(D)** and the time before sacrifice **(E)** to ensure the function of RVOT pacing over >99% pacing to create RVOT bigeminy VPC. Also, in panel **(E)**, we illustrated a 12-lead electrocardiogram to show the feature of RVOT bigeminy VPC before sacrifice.

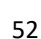

Supplement: s1 [file s1]
